# Supplementary material
Source: PubMed Central journal article supplement (PMC5397584)
Supplement: NIHMS857245-supplement-Supplemental_Info.pdf [file NIHMS857245-supplement-Supplemental_Info.pdf]

# Genetic Markers of Human Evolution Are Enriched in Schizophrenia

## *Supplementary Information*

### Contents

**Table S1.** Genome-wide association studies samples with available summary statistics.

**Table S2.** Neanderthal selective sweep, squared z-score regression and binomial proportion test after removal of major histocompatibility complex SNPs.

**Table S3.** Neanderthal selective sweep, squared z-score regression and binomial proportion test using affiliation scores.

**Table S4.** SNPs associated with schizophrenia conditioned on Neanderthal selective sweep score.

**Fig. S1.** Distribution of Neanderthal selective sweep scores.

**Fig. S2.** Q-Q and fold enrichment plots of schizophrenia stratified according to Neanderthal selective sweep score after exclusion of major histocompatibility complex SNPs.

**Fig. S3** Q-Q and fold enrichment plots of schizophrenia stratified according to Neanderthal selective sweep region affiliation scores after Green *et al.* and Prüfer *et al.*.

**Fig. S4.** Q-Q and fold enrichment plots of three psychiatric phenotypes stratified according to Neanderthal selective sweep scores.

**Fig. S5.** Q-Q and fold enrichment plots of three neurological phenotypes stratified according to Neanderthal selective sweep scores.

**Fig. S6.** Q-Q and fold enrichment plots of the first edition of the schizophrenia genome-wide association studies by the Psychiatric Genomic Consortium stratified according to Neanderthal selective sweep scores.

**Fig. S7.** Direction of effect for human allele z-score versus Neanderthal selective sweep score.

**Fig. S8.** Effect size comparison.

**Fig. S9.** Q-Q and fold enrichment plots of schizophrenia autosome and X chromosome genome-wide association study stratified according to Neanderthal selective sweep score.

### Supplemental Methods & Materials

### Author Notes

### Supplemental References

**Table S1. Genome-wide association studies samples with available summary statistics.**

|                                              | Phenotype                                           | Sample Size<br>( <i>N</i> ) | Number of SNPs<br>Total (NSS) |
|----------------------------------------------|-----------------------------------------------------|-----------------------------|-------------------------------|
| Central nervous system<br>(CNS) disorders    | Alzheimer's disease (1) (AD)                        | 54,162                      | 2,436,961 (382,008)           |
|                                              | Attention-deficit/hyperactivity disorder (2) (ADHD) | 19,210                      | 1,163,004 (192,272)           |
|                                              | Bipolar disorder (3) (BD)                           | 16,731                      | 2,406,338 (375,625)           |
|                                              | Major depressive disorder (4) (MDD)                 | 18,759                      | 1,170,068 (193,732)           |
|                                              | Migraine (5)                                        | 118,710                     | 1,834,101 (301,046)           |
|                                              | Multiple sclerosis (6) (MS)                         | 27,148                      | 458,752 (77,506)              |
|                                              | Schizophrenia (PGC1) (7)                            | 21,856                      | 1,171,056 (193,841)           |
|                                              | Schizophrenia (PGC2) (8)                            | 82,315                      | 2,538,794 (395,798)           |
| Anthropometric<br>measures                   | Body mass index (9) (BMI)                           | 123,865                     | 2,400,377 (374,879)           |
|                                              | Height (10)                                         | 183,727                     | 2,398,527 (374,673)           |
|                                              | Waist hip ratio (11) (WHR)                          | 77,167                      | 2,376,820 (370,838)           |
| Cardiovascular disease<br>(CVD) risk factors | Systolic blood pressure (12) (SBP)                  | 203,056                     | 2,382,073 (371,417)           |
|                                              | Total cholesterol (13) (TC)                         | 100,184                     | 2,508,369 (391,044)           |
|                                              | Triglycerides (13) (TG)                             | 96,568                      | 2,508,363 (391,050)           |
| Immune-mediated<br>diseases                  | Crohn's disease (14) (CD)                           | 51,109                      | 942,858 (162,435)             |
|                                              | Celiac disease (15) (CeD)                           | 15,283                      | 517,873 (86,870)              |
|                                              | Rheumatoid arthritis (16) (RA)                      | 25,708                      | 2,462,228 (385,820)           |
|                                              | Ulcerative colitis (17) (UC)                        | 26,405                      | 1,273,589 (209,118)           |

Genome-wide association studies analyzed. The table shows the phenotypes, the sample size (i.e. the number of subjects, *N*); the total number of SNPs entering our analyses and the number of SNPs with Neanderthal selective sweep scores (NSS, within parentheses). PGC: Psychiatric Genomics Consortium, results from the first edition of the schizophrenia study by the Psychiatric Genomics Consortium (PGC1) and the second larger edition of the schizophrenia PGC study (PGC2).

**Table S2. Neanderthal selective sweep, squared z-score regression and binomial proportion test after removal of major histocompatibility complex SNPs.**

| GWAS     | $\beta$ (Min, Max)      | Std. Error | <i>p</i> -Value | C.I.           | BPT(p) 1%(Min, Max)        |
|----------|-------------------------|------------|-----------------|----------------|----------------------------|
| AD       | -0.012 (-0.029, 0.012)  | 0.016      | 4.90E-01        | -0.041, 0.021  | 2.5E-01 (7.6E-04, 5.9E-01) |
| ADHD     | 0.003 (-0.013, 0.017)   | 0.013      | 8.50E-01        | -0.022, 0.027  | 4.4E-01 (3.5E-02, 6.2E-01) |
| BD       | -0.004 (-0.020, 0.013)  | 0.01       | 7.40E-01        | -0.023, 0.016  | 4.8E-01 (1.4E-02, 9.1E-01) |
| MDD      | -0.017 (-0.034, -0.006) | 0.012      | 2.10E-01        | -0.042, 0.007  | 5.6E-01 (1.1E-01, 9.4E-01) |
| Migraine | -0.006 (-0.029, -0.001) | 0.013      | 6.90E-01        | -0.032, 0.020  | 7.4E-01 (2.3E-01, 9.2E-01) |
| MS       | -0.008 (-0.034, 0.023)  | 0.019      | 7.00E-01        | -0.046, 0.030  | 5.0E-01 (8.7E-03, 8.5E-01) |
| SCZ 1    | -0.039 (-0.051, -0.024) | 0.013      | 5.40E-03        | -0.064, -0.015 | 1.6E-01 (1.6E-02, 6.1E-01) |
| SCZ 2    | -0.069 (-0.076, -0.058) | 0.01       | <b>2.10E-09</b> | -0.089, -0.049 | 8.7E-02 (5.3E-06, 3.4E-01) |
| BMI      | -0.050 (-0.061, -0.036) | 0.016      | 4.50E-03        | -0.079, -0.023 | 4.1E-01 (6.1E-02, 9.2E-01) |
| Height   | -0.074 (-0.095, -0.058) | 0.015      | <b>8.80E-06</b> | -0.104, -0.045 | 1.1E-01 (3.4E-04, 6.9E-01) |
| WHR      | -0.026 (-0.040, -0.019) | 0.011      | 2.80E-02        | -0.047, -0.005 | 2.3E-01 (7.0E-03, 5.1E-01) |
| SBP      | -0.015 (-0.023, -0.003) | 0.01       | 1.90E-01        | -0.035, 0.005  | 3.7E-01 (9.4E-02, 7.3E-01) |
| TC       | -0.001 (-0.019, 0.023)  | 0.019      | 9.60E-01        | -0.038, 0.039  | 5.2E-01 (3.1E-01, 8.6E-01) |
| TG       | -0.017 (-0.024, -0.003) | 0.015      | 3.30E-01        | -0.048, 0.014  | 4.3E-01 (8.1E-03, 8.3E-01) |
| CD       | -0.025 (-0.050, 0.003)  | 0.019      | 2.50E-01        | -0.062, 0.014  | 5.3E-01 (2.6E-01, 8.6E-01) |
| CeD      | -0.000 (-0.024, 0.018)  | 0.018      | 9.90E-01        | -0.037, 0.035  | 3.7E-01 (1.2E-01, 8.4E-01) |
| RA       | -0.005 (-0.020, 0.009)  | 0.011      | 6.90E-01        | -0.027, 0.017  | 5.6E-01 (2.0E-02, 8.8E-01) |
| UC       | -0.017 (-0.028, 0.015)  | 0.015      | 3.20E-01        | -0.047, 0.014  | 5.2E-01 (1.6E-01, 9.2E-01) |

Phenotypes: psychiatric and other neurological diseases (Alzheimer's disease (AD), attention-deficit/hyperactivity disorder (ADHD), bipolar disorder (BD), major depressive disorder (MDD), migraine, multiple sclerosis (MS), first and second edition of the schizophrenia GWAS by the Psychiatric Genomic Consortium (SCZ1 and SCZ2)), anthropometric measures (body mass index (BMI), height, waist-hip ratio (WHR)), cardiovascular risk factors (systolic blood pressure (SBP), total cholesterol (TC), triglycerides (TG)), immune-mediated diseases (Crohn's disease (CD), celiac disease (CeD), rheumatoid arthritis (RA), ulcerative colitis (UC)).

**Table S3. Neanderthal selective sweep, squared z-score regression and binomial proportion test using affiliation scores.**

| GWAS     | $\beta$ | Std. Error | <i>p</i> -Value | C.I. Lower | C.I. Upper | BPT(p) 1% |
|----------|---------|------------|-----------------|------------|------------|-----------|
| AD       | 0.000   | 0.013      | 9.75E-01        | -0.025     | 0.024      | 2.20E-03  |
| ADHD     | 0.005   | 0.013      | 7.42E-01        | -0.017     | 0.029      | 6.00E-01  |
| BD       | 0.008   | 0.009      | 4.19E-01        | -0.009     | 0.025      | 7.10E-01  |
| MDD      | 0.000   | 0.013      | 9.74E-01        | -0.026     | 0.024      | 5.80E-01  |
| Migraine | 0.022   | 0.010      | 5.67E-02        | 0.001      | 0.042      | 4.00E-02  |
| MS       | 0.022   | 0.021      | 3.52E-01        | -0.024     | 0.062      | 5.40E-02  |
| SCZ 1    | 0.022   | 0.013      | 1.33E-01        | -0.003     | 0.048      | 2.70E-03  |
| SCZ 2    | 0.053   | 0.009      | 4.03E-07        | 0.035      | 0.072      | 2.30E-06  |
| BMI      | -0.004  | 0.010      | 7.47E-01        | -0.024     | 0.017      | 9.40E-04  |
| Height   | 0.010   | 0.012      | 4.44E-01        | -0.013     | 0.035      | 6.10E-04  |
| WHR      | 0.004   | 0.009      | 6.71E-01        | -0.013     | 0.022      | 2.90E-01  |
| SBP      | -0.008  | 0.009      | 4.13E-01        | -0.026     | 0.009      | 1.40E-01  |
| TC       | 0.017   | 0.016      | 3.62E-01        | -0.015     | 0.051      | 1.00E-01  |
| TG       | 0.006   | 0.016      | 7.33E-01        | -0.025     | 0.036      | 5.40E-06  |
| CD       | 0.003   | 0.022      | 9.14E-01        | -0.036     | 0.043      | 7.10E-01  |
| CeD      | 0.013   | 0.020      | 5.45E-01        | -0.025     | 0.055      | 7.00E-01  |
| RA       | 0.006   | 0.009      | 5.43E-01        | -0.012     | 0.025      | 9.80E-02  |
| UC       | 0.003   | 0.015      | 8.80E-01        | -0.026     | 0.034      | 4.10E-01  |

Phenotypes: psychiatric and other neurological diseases (Alzheimer's disease (AD), attention-deficit/hyperactivity disorder (ADHD), bipolar disorder (BD), major depressive disorder (MDD), migraine, multiple sclerosis (MS), first and second edition of the schizophrenia GWAS by the Psychiatric Genomic Consortium (SCZ1 and SCZ2)), anthropometric measures (body mass index (BMI), height, waist-hip ratio (WHR)), cardiovascular risk factors (systolic blood pressure (SBP), total cholesterol (TC), triglycerides (TG)), immune-mediated diseases (Crohn's disease (CD), celiac disease (CeD), rheumatoid arthritis (RA), ulcerative colitis (UC)).

**Table S4. SNPs associated with schizophrenia conditioned on Neanderthal selective sweep score.**

| SNP ID     | Gene     | HAZ    | p Value  | FDR      | Cond FDR | NSS Replication Rate | NSS Rep SD | All SNPs Rep rate | All SNPs Rep SD | NSS    | LD Count  | Total LD    | Ancestral Allele Frequency | PhyloP Primates | PhyloP Mammals | Heterozygosity | Function                                                                                                                                                             | Associated Phenotypes                                                               |
|------------|----------|--------|----------|----------|----------|----------------------|------------|-------------------|-----------------|--------|-----------|-------------|----------------------------|-----------------|----------------|----------------|----------------------------------------------------------------------------------------------------------------------------------------------------------------------|-------------------------------------------------------------------------------------|
| rs946106   | AGBL4    | 4.48   | 1.22E-04 | 9.22E-02 | 1.31E-04 | NaN                  | NaN        | 0.176             | 0.090           | -0.403 | 591 (97%) | 253.3 (95%) | 0.77 (27%)                 | 0.37 (13%)      | 0.72 (41%)     | 0.14 (15%)     | Encodes an ATP binding protein which is involved in metalloproteinase activity and tubulin binding                                                                   | Celiac disease                                                                      |
| rs2291409  | AKT3     | 4.16   | 8.83E-04 | 1.97E-01 | 8.04E-04 | NaN                  | NaN        | 0.330             | 0.128           | -1.056 | 315 (87%) | 161.4 (86%) | 0.30 (7%)                  | -0.68 (43%)     | -0.75 (53%)    | 0.14 (14%)     | Encodes kinases involved in cell signalling in for insulin and growth factors                                                                                        | Melanoma, carcinomas, prostate cancer                                               |
| rs10906984 | AP3B2    | 4.732  | 1.47E-04 | 9.37E-02 | 1.62E-04 | NaN                  | NaN        | 0.312             | 0.140           | -0.129 | 254 (80%) | 124.7 (79%) | -                          | -               | -              | -              | Encodes a vesicle-coat protein complex. Some of which are expressed exclusively in neurons (18)                                                                      | Carcinomas and melanomas                                                            |
| rs13084588 | BBX      | -3.695 | 3.30E-03 | 7.40E-01 | 6.97E-03 | 0.273                | 0.081      | 0.156             | 0.048           | -0.314 | 126 (54%) | 82.5 (64%)  | 0.87 (33%)                 | 0.32 (6%)       | 0.80 (68%)     | 0.13 (11%)     | Encodes for a protein                                                                                                                                                | Lymphocytic gastritis                                                               |
| rs7901209  | C10orf76 | 3.643  | 3.21E-03 | 7.40E-01 | 6.97E-03 | 0.237                | 0.081      | 0.135             | 0.051           | -0.203 | 104 (46%) | 54.8 (48%)  | -                          | -               | -              | -              | Might be involved in transcriptional regulation (19)                                                                                                                 | Alzheimer's                                                                         |
| rs4369701  | CDH11    | 4.258  | 2.73E-04 | 9.70E-02 | 2.53E-04 | 0.235                | 0.107      | 0.147             | 0.084           | -0.166 | 75 (34%)  | 23.4 (20%)  | -                          | -               | -              | -              | Encodes membrane protein involved in cellular adhesion                                                                                                               | Overexpressed in cancer cells                                                       |
| rs10926976 | CEP170   | 5.078  | 4.80E-05 | 7.81E-02 | 7.94E-05 | 0.329                | 0.109      | 0.227             | 0.098           | -0.742 | 353 (89%) | 164.8 (87%) | 0.49 (13%)                 | -0.70 (46%)     | 0.53 (13%)     | 0.13 (11%)     | Encodes protein that is component of the centrosome and is involved in microtubule organization (20)                                                                 | Ciliary dyskinesia                                                                  |
| rs11688397 | CUL3     | -4.362 | 2.01E-04 | 9.50E-02 | 2.02E-04 | NaN                  | NaN        | NaN               | NaN             | -0.489 | 105 (47%) | 64.7 (54%)  | -                          | -               | -              | -              | Protein coding gene                                                                                                                                                  | Blood vessel malformations                                                          |
| rs11123288 | DPP10    | -3.489 | 3.06E-03 | 7.40E-01 | 6.97E-03 | 0.290                | 0.089      | 0.170             | 0.073           | -0.067 | 369 (90%) | 128.6 (80%) | 0.77 (26%)                 | -0.33 (2%)      | -0.59 (23%)    | 0.13 (11%)     | Encodes a membrane protein involved in functioning of voltage gated potassium channels (21)                                                                          | Asthma, autism spectrum disorders                                                   |
| rs1421750  | FLJ33630 | -4.082 | 5.32E-04 | 1.23E-01 | 5.04E-04 | NaN                  | NaN        | 0.166             | 0.086           | -0.463 | 200 (72%) | 100.3 (71%) | 0.33 (8%)                  | -0.89 (60%)     | -0.64 (35%)    | 0.16 (21%)     | Not known but expressed in brain and other tissues                                                                                                                   | Cancer                                                                              |
| rs17662328 | FOXP1    | -3.46  | 3.54E-03 | 7.40E-01 | 6.97E-03 | NaN                  | NaN        | 0.225             | 0.136           | -0.697 | 222 (76%) | 121.1 (78%) | -                          | -               | -              | -              | Encodes for protein in the forkhead box transcription factor family. Plays important roles in the regulation of transcription during both development and adulthood. | Mental retardation with language impairment and autistic features, and hypertension |
| rs1127091  | GATAD2B  | -3.809 | 2.24E-03 | 5.36E-01 | 2.51E-03 | 0.275                | 0.085      | 0.154             | 0.047           | -0.265 | 289 (84%) | 144.6 (83%) | 0.50 (13%)                 | 2.11 (95%)      | 0.63 (22%)     | 0.13 (11%)     | Zinc finger protein-coding gene                                                                                                                                      | Mental retardation                                                                  |
| rs2230653  | HIST1H1C | 3.891  | 2.70E-03 | 6.41E-01 | 3.94E-03 | 0.287                | 0.104      | 0.174             | 0.073           | -0.321 | 41 (17%)  | 19.5 (16%)  | 0.97 (41%)                 | -2.37 (96%)     | -1.26 (78%)    | 0.21 (39%)     | Encodes for a histone protein                                                                                                                                        | NA                                                                                  |

| SNP ID     | Gene     | HAZ    | p Value  | FDR      | Cond FDR | NSS Replication Rate | NSS Rep SD | All SNPs Rep rate | All SNPs Rep SD | NSS    | LD Count  | Total LD    | Ancestral Allele Frequency | PhyloP Primates | PhyloP Mammals | Heterozygosity | Function                                                                                                       | Associated Phenotypes                              |
|------------|----------|--------|----------|----------|----------|----------------------|------------|-------------------|-----------------|--------|-----------|-------------|----------------------------|-----------------|----------------|----------------|----------------------------------------------------------------------------------------------------------------|----------------------------------------------------|
| rs5762416  | KIAA1648 | -3.7   | 3.01E-03 | 7.40E-01 | 6.97E-03 | 0.175                | 0.051      | 0.105             | 0.022           | -0.024 | 189 (70%) | 70.5 (58%)  | 0.50 (14%)                 | 0.44 (24%)      | 0.47 (6%)      | 0.13 (13%)     | Encodes protein that localizes in membrane                                                                     | NA                                                 |
| rs254778   | MEF2C    | -4.671 | 2.00E-04 | 9.50E-02 | 2.02E-04 | 0.291                | 0.104      | 0.174             | 0.075           | -0.245 | 159 (63%) | 83.2 (64%)  | -                          | -               | -              | -              | Encodes for a transcription factor. Involved in myogenesis and vascular development (22)                       | severe psychomotor retardation                     |
| rs4799358  | NOL4     | -4.724 | 1.39E-04 | 9.22E-02 | 1.31E-04 | NaN                  | NaN        | NaN               | NaN             | -0.144 | 109 (48%) | 42.9 (38%)  | 0.53 (14%)                 | -0.49 (24%)     | 0.74 (46%)     | 0.17 (26%)     | Encodes for RNA binding nucleolar protein                                                                      | Major depressive disorder, and cervical cancer     |
| rs11190855 | NRG3     | 3.551  | 2.24E-03 | 5.36E-01 | 2.51E-03 | 0.277                | 0.092      | 0.160             | 0.065           | -0.506 | 345 (89%) | 153.1 (85%) | 0.90 (36%)                 | 0.69 (53%)      | 0.74 (46%)     | 0.14 (17%)     | Encodes ligands for the transmembrane tyrosine kinase receptors                                                | Schizophrenia, Hirschsprung's disease              |
| rs4971695  | NRXN1    | 4.429  | 4.06E-04 | 1.08E-01 | 4.00E-04 | 0.313                | 0.093      | 0.185             | 0.077           | -0.745 | 96 (43%)  | 33.5 (30%)  | 0.76 (26%)                 | -0.31 (0%)      | 0.95 (95%)     | 0.17 (28%)     | Encodes proteins which works in the central nervous system (23)                                                | Schizophrenia, autism, and intellectual disability |
| rs1153877  | PCCB     | -4.767 | 4.55E-05 | 7.81E-02 | 7.94E-05 | NaN                  | NaN        | NaN               | NaN             | -0.15  | 605 (97%) | 241.7 (94%) | 0.60 (17%)                 | -2.94 (98%)     | -3.09 (99%)    | 0.18 (29%)     | Encodes protein                                                                                                | Propionic acidemia type II, encephalopathy         |
| rs1345154  | PPP2R3A  | -3.986 | 5.91E-04 | 1.52E-01 | 6.36E-04 | NaN                  | NaN        | NaN               | NaN             | -0.186 | 46 (20%)  | 33.3 (30%)  | -                          | -               | -              | -              | Codes one of the regulatory subunits of the protein phosphatase, calcium ion binding                           | NA                                                 |
| rs10400055 | SORCS3   | 3.757  | 2.52E-03 | 6.41E-01 | 3.94E-03 | NaN                  | NaN        | 0.162             | 0.068           | -0.557 | 514 (95%) | 211.0 (92%) | -                          | -               | -              | -              | Encodes a vacuolar protein expressed in the central nervous system involved in neuropeptide signaling pathway  | Alzheimer's disease                                |
| rs1878874  | SOX2OT   | NaN    | 2.00E-05 | 4.96E-02 | 1.19E-04 | 0.112                | 0.011      | 0.079             | 0.004           | -1.533 | 96 (43%)  | 33.7 (30%)  | -                          | -               | -              | -              | Long non-coding RNA expressed in zones of neurogenesis (24)                                                    | Anophthalmia                                       |
| rs10492904 | TK2      | NaN    | 2.97E-03 | 7.40E-01 | 6.97E-03 | 0.111                | 0.010      | 0.078             | 0.004           | -1.106 | 240 (79%) | 77.0 (61%)  | 0.14 (3%)                  | -0.60 (36%)     | 0.74 (45%)     | 0.05 (0%)      | Encodes a kinase and is required for mitochondrial DNA synthesis                                               | Mitochondrial DNA depletion syndrome               |
| rs2196806  | VRK2     | 4.252  | 7.62E-04 | 1.97E-01 | 8.04E-04 | NaN                  | NaN        | 0.224             | 0.120           | -0.006 | 292 (85%) | 128.3 (80%) | 0.89 (35%)                 | -1.23 (76%)     | -1.23 (77%)    | 0.17 (28%)     | Encodes a protein that acts as an effector of signaling pathways, regulating apoptosis and tumor cell growth   | Schizophrenia/Bipolar disorder                     |
| rs7556184  | XPR1     | 3.645  | 1.70E-03 | 4.33E-01 | 1.76E-03 | 0.258                | 0.081      | 0.146             | 0.050           | -0.075 | 126 (54%) | 73.2 (59%)  | -                          | -               | -              | -              | Encodes protein involved in transmembrane signaling receptor activity and G-protein coupled receptor activity. | NA                                                 |
| rs7856690  | ZCCHC7   | NaN    | 1.84E-04 | 9.50E-02 | 2.02E-04 | 0.111                | 0.010      | 0.078             | 0.004           | -0.601 | 254 (80%) | 139.4 (82%) | -                          | -               | -              | -              | Encodes for a zinc finger protein involved in nucleic acid binding (25)                                        | Autoimmune disorders                               |
| rs11888068 | ZNF804A  | -4.137 | 4.44E-04 | 1.08E-01 | 4.00E-04 | NaN                  | NaN        | NaN               | NaN             | -0.467 | 131 (56%) | 56.5 (49%)  | 0.72 (23%)                 | -0.47 (21%)     | -0.56 (15%)    | 0.13 (12%)     | Encodes for a zinc finger protein                                                                              | Schizophrenia/Bipolar disorder                     |

Given are: genes in association, based on their proximity to the SNP; human (non ancestral) allele z-score (HAZ); SNP association  $p$ -value, SNP false discovery rate (FDR), SNP conditional false discovery rate (condFDR), Neanderthal selective sweep (NSS) score, linkage disequilibrium (LD) count, i.e. number of 1000G SNPs within 1 Mb and with an LD  $r^2 \geq 0.2$  (in parentheses, percentage of SNPs with LD count below that); total LD, i.e. sum of the LD  $r^2$  with the aforesaid 1000G SNPs (in parentheses, percentage of SNPs with total LD below that); ancestral allele frequency; phyloP44wayPrimate acceleration/conservation score from the UCSC genome browser (in parentheses, percentage of SNPs with absolute score below that); phyloP44wayPlacMammal acceleration/conservation score from the UCSC genome browser (in parentheses, percentage of SNPs with absolute score below that); heterozygosity (in parentheses, percentage of SNPs with heterozygosity below that); known functions and phenotypes associated with the variant.

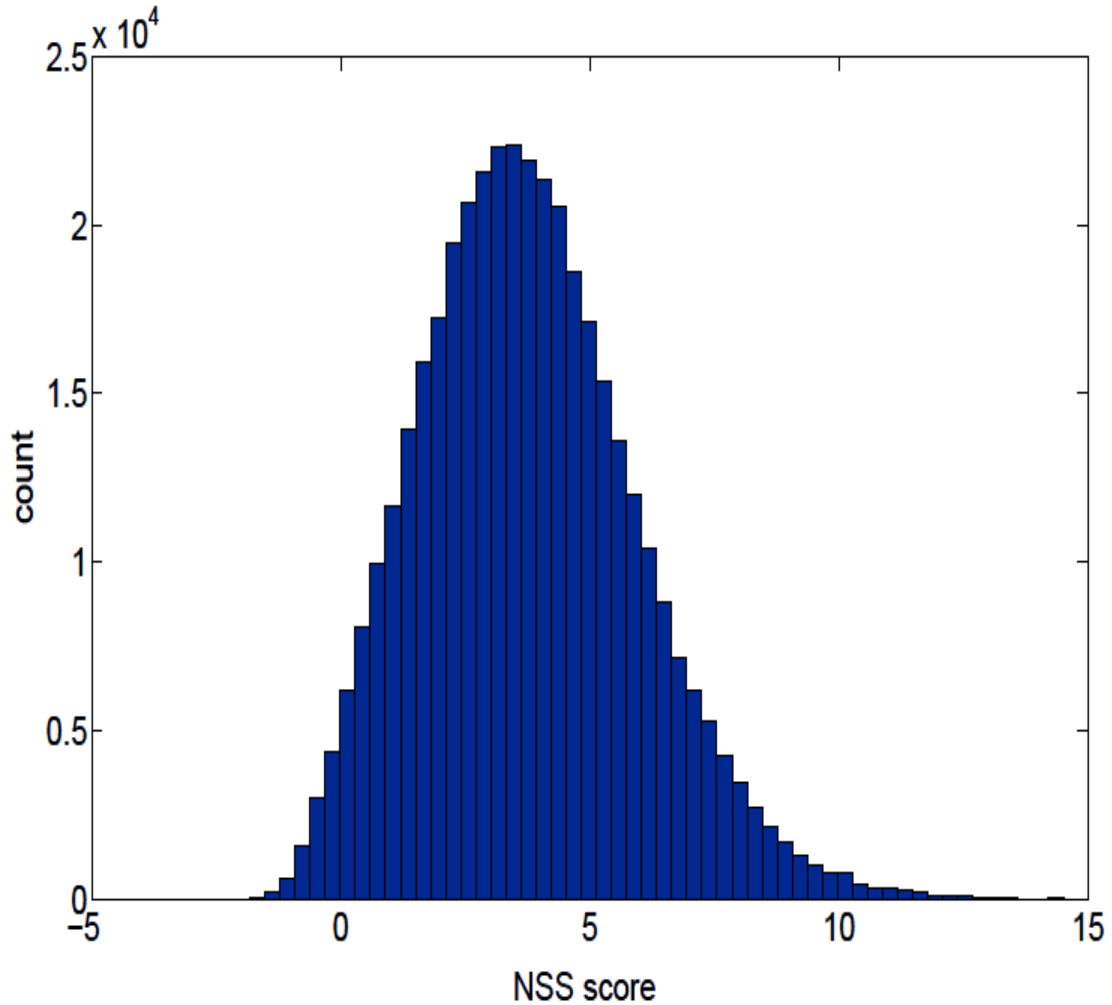

**Fig. S1. Distribution of Neanderthal selective sweep scores.** The Neanderthal selective sweep (NSS) score track was downloaded from the UCSC genome browser (S-scores, track ntSssZScorePMVar, <http://genome.ucsc.edu>). This track consists of two entries per SNP, which the authors call ( $z$  score + variance) and ( $z$  score - variance). Since a negative NSS-score is expected to indicate a possible positive selection in humans, the ( $z$ -score + variance) entries are conservative measures of positive selection likelihood. These were extracted for all SNPs in the genome-wide association studies of interest (**Table S1**) and follow the distribution illustrated here.



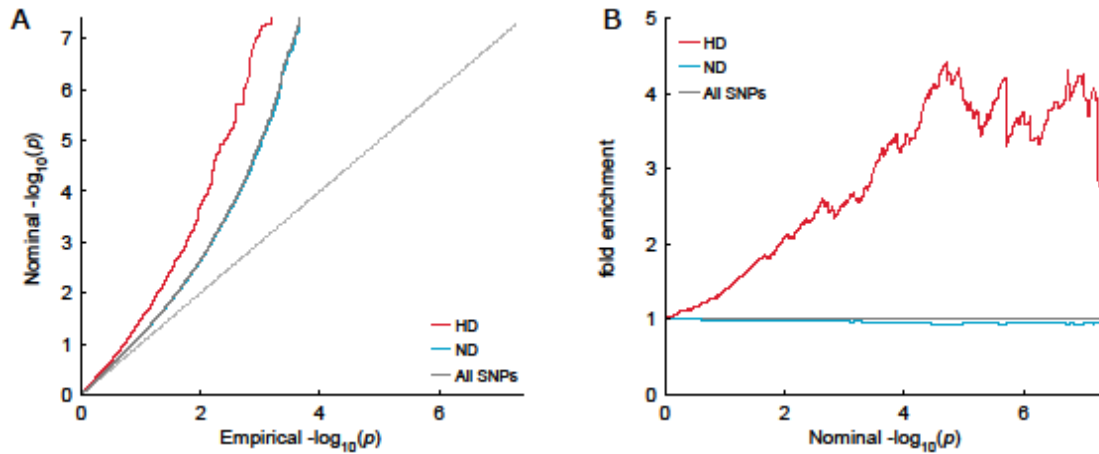

**Fig. S2. Q-Q and fold enrichment plots of schizophrenia stratified according to Neanderthal selective sweep score after exclusion of MHC SNPs.** Reported are (A) quantile-quantile (Q-Q) and (B) fold enrichment plots of GWAS summary statistics  $p$ -values for schizophrenia, stratified on the basis of Neanderthal selective sweep scores after removing SNPs in the major histocompatibility complex (MHC) from the analysis. The enrichment of the human divergent (HD) category, represented by its deflection from the diagonal (A), is still clear, suggesting that the MHC does not have a great effect on the enrichment of HD SNPs (Fig. 1). The non-divergent (ND) SNPs also show unchanged deflection from the baseline (B; All SNPs). This suggests that there is no relevant overlap among MHC SNPs and the SCZ susceptibility SNPs in human divergent regions.

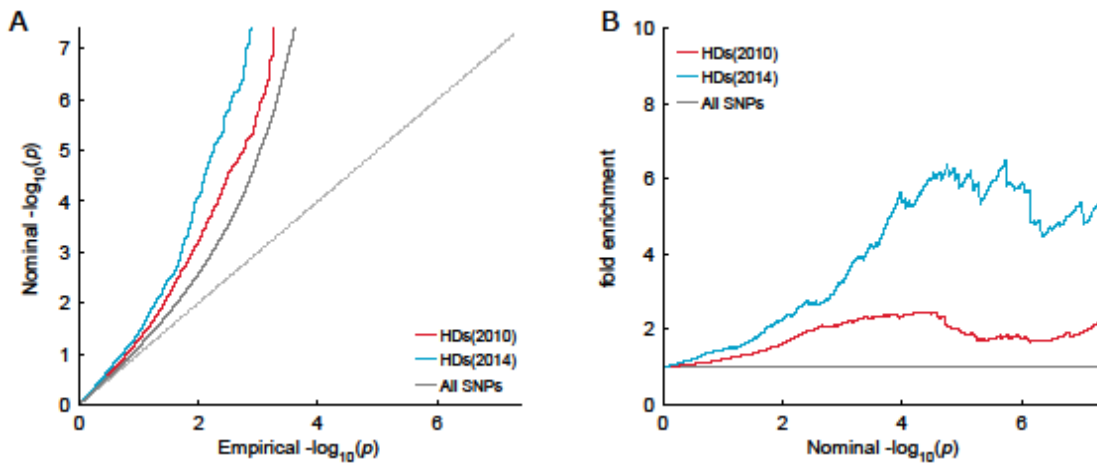

**Fig. S3. Q-Q and fold enrichment plots of schizophrenia stratified according to Neanderthal selective sweep region affiliation scores after Green *et al.* (26) and Prüfer *et al.* (27).** Reported are (A) quantile-quantile (Q-Q) and (B) fold enrichment plots of genome-wide association study summary statistics  $p$ -values for schizophrenia, stratified based on Neanderthal selective sweep scores (NSS). The strata are determined here by LD-informed annotation scores for DNA regions significantly (top 5%) likely to have undergone recent positive selection in humans. The DNA regions were identified using respectively the draft sequence of the Neanderthal genome (HDs2010) by Green *et al.* 2010 (26) and the complete sequence of the Neanderthal genome (HDs2014) by Prüfer *et al.* 2014 (27). The enrichment plot (B) shows 2-7 fold enrichment for SNPs in regions with significantly negative NSS score, i.e. the human divergent (HD) SNPs stratum, compared with all SNPs (All SNPs).

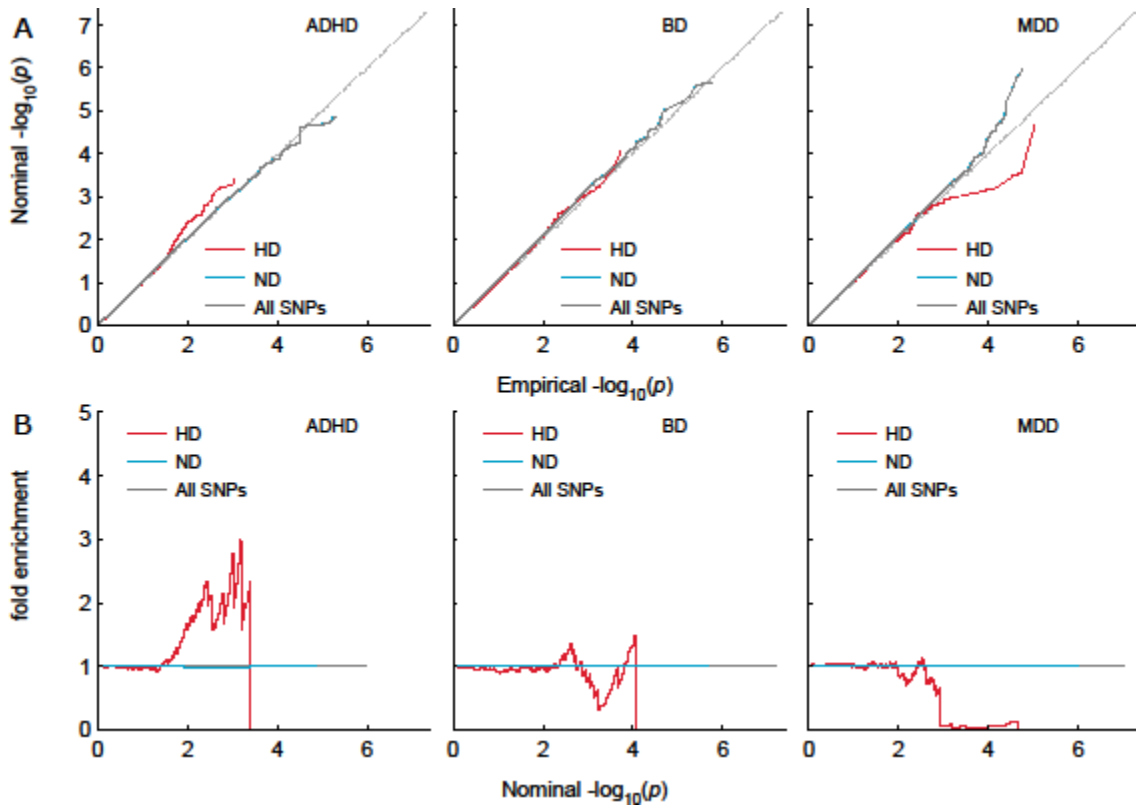

**Fig. S4. Q-Q and fold enrichment plots of three psychiatric phenotypes stratified according to Neanderthal selective sweep scores.** Phenotypes: attention-deficit/hyperactivity disorder (ADHD), bipolar disorder (BD) and major depressive disorder (MDD). **(A)** The quantile-quantile (Q-Q) plots show genome-wide association studies summary statistics  $p$ -values of SNPs tagging human divergent regions (HD), non-divergent (ND) regions as well as all SNPs (All SNPs). As observed for non-psychiatric phenotypes (**Fig. 2**), there is no indication of enrichment the likes of that seen for schizophrenia in (**Fig. 1**). **(B)** The fold enrichment counterparts of the Q-Q plots in **(A)** emphasize the association enrichment. ADHD in particular does present some deflection but the number of SNPs involved is too exiguous to result in any significant association as measured by the regression analysis (**Table S2**).

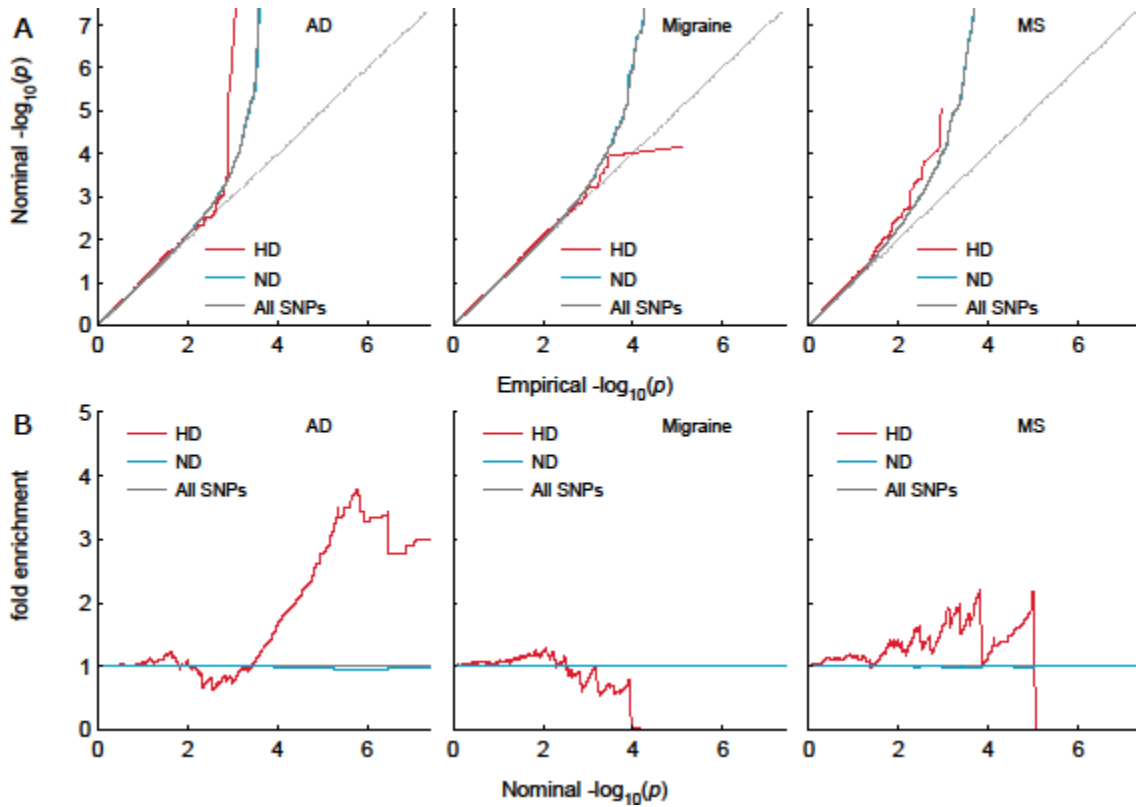

**Fig. S5. Q-Q and fold enrichment plots of three neurological phenotypes stratified according to Neanderthal selective sweep scores.** Phenotypes: Alzheimer's disease (AD), migraine and multiple sclerosis (MS). (A) The quantile-quantile (Q-Q) plots show genome-wide association studies summary statistics  $p$ -values of SNPs tagging human divergent regions (HD), non-divergent (ND) regions as well as all SNPs (All SNPs). As observed for other phenotypes (Fig. 2), there is no indication of enrichment the likes of that seen for schizophrenia in (Fig. 1). (B) The fold enrichment counterparts of the Q-Q plots in (A) emphasize the association enrichment or rather the lack thereof.

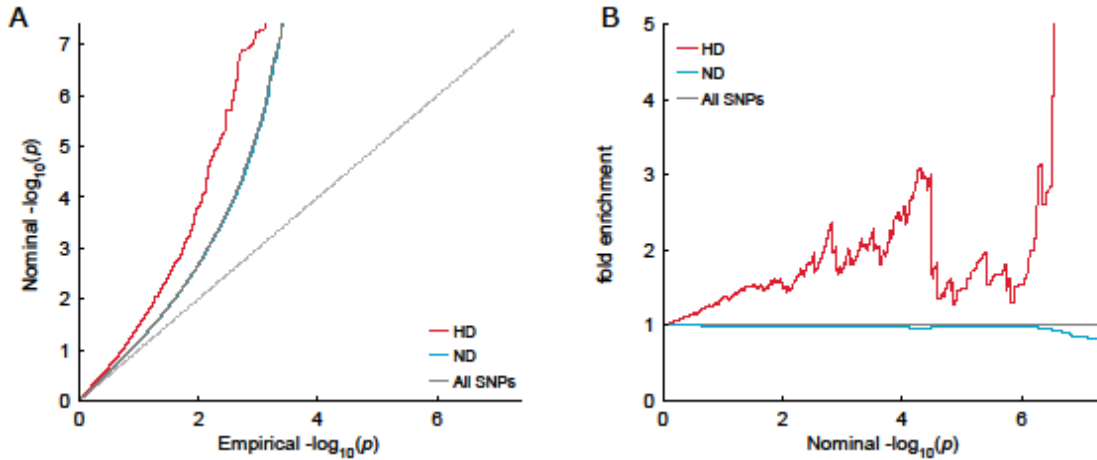

**Fig. S6. Q-Q and fold enrichment plots of the first edition of the schizophrenia genome-wide association study by the Psychiatric Genomic Consortium stratified according to Neanderthal selective sweep scores.** Reported are (A) quantile-quantile (Q-Q) and (B) fold enrichment plots of first edition of the Psychiatric Genomic Consortium (PGC) schizophrenia genome-wide association studies. The enrichment is not as strong as seen with the larger second edition of the PGC schizophrenia GWAS (**Fig. 1**) but is confirmed by a nominally significant association between squared z-scores and Neanderthal selective sweep scores (**Table 1**).

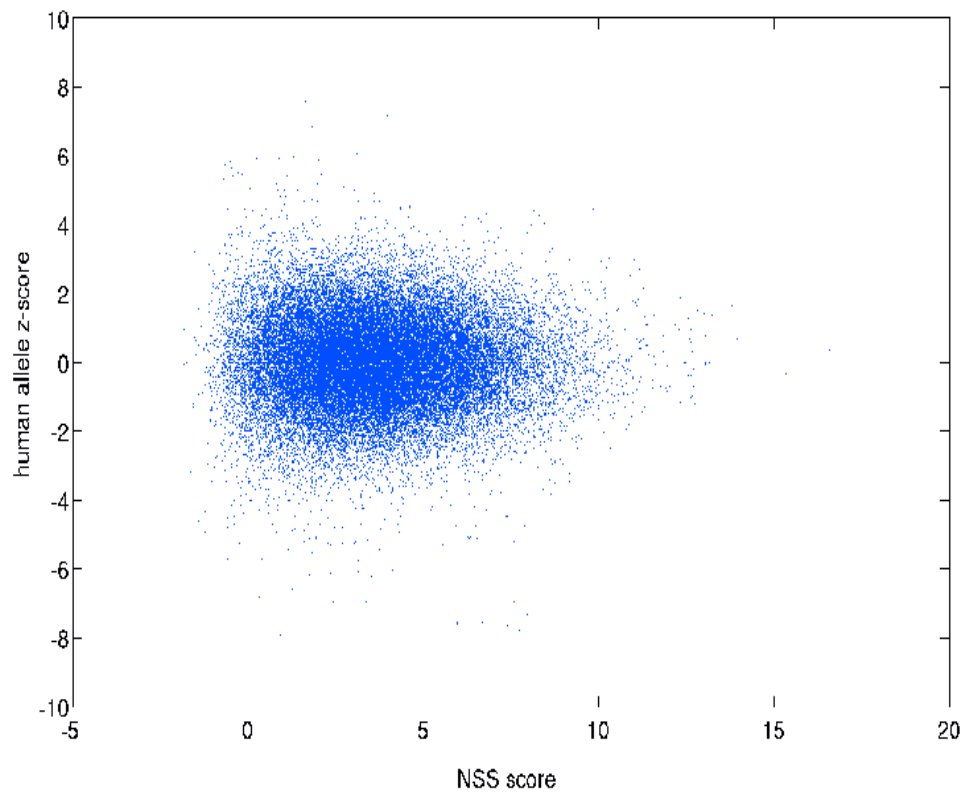

**Fig. S7. Direction of effect for human allele z-score versus Neanderthal selective sweep score.** No obvious directional preponderance can be discerned in the correlation between Neanderthal selective sweep score (NSS) and effect of the non-ancestral allele on schizophrenia. A linear regression of z scores versus NSS scores does not yield any significant results.

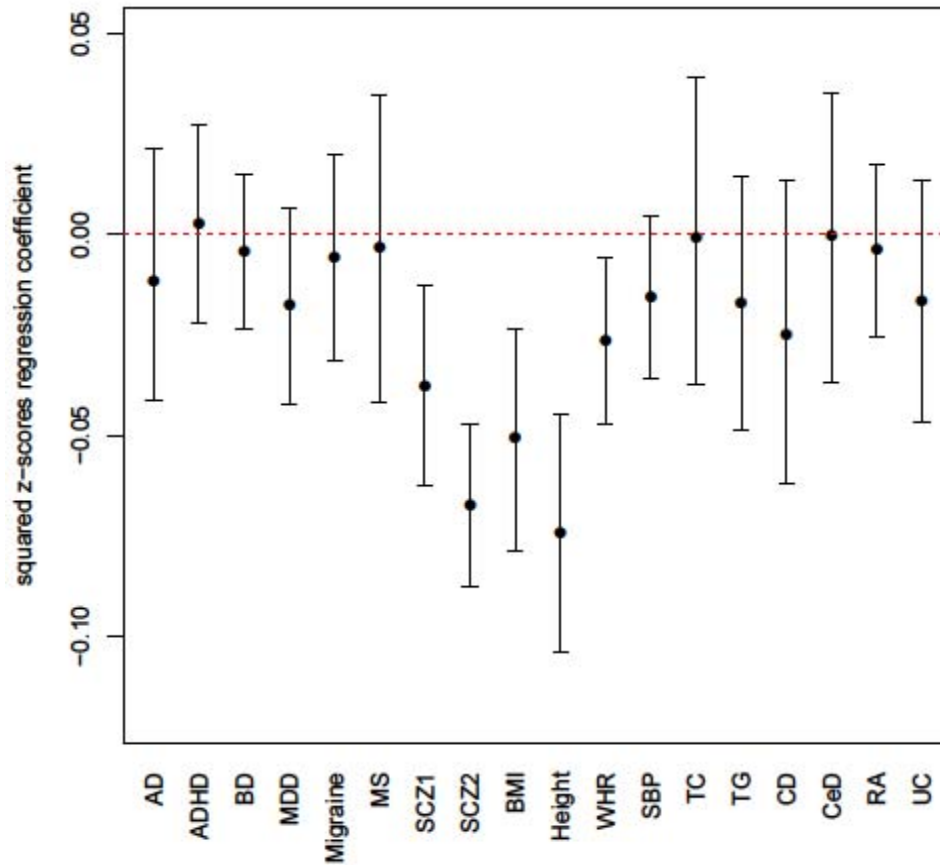

**Fig. S8. Effect size comparison.** Squared z-scores logarithm Neanderthal selective sweep score regression coefficients (mean  $\pm$  SE) for phenotypes: psychiatric and other neurological diseases (Alzheimer's disease (AD), attention-deficit/hyperactivity disorder (ADHD), bipolar disorder (BD), major depressive disorder (MDD), migraine, multiple sclerosis (MS), first and second edition of the schizophrenia GWAS by the Psychiatric Genomic Consortium (SCZ1 and SCZ2)), body mass index (BMI), height, waist-hip ratio (WHR), systolic blood pressure (SBP), total cholesterol (TC), triglycerides (TG), Crohn's disease (CD), celiac disease (CeD), rheumatoid arthritis (RA), ulcerative colitis (UC). For sample sizes in the respective genome-wide association studies, see **Table S1**.

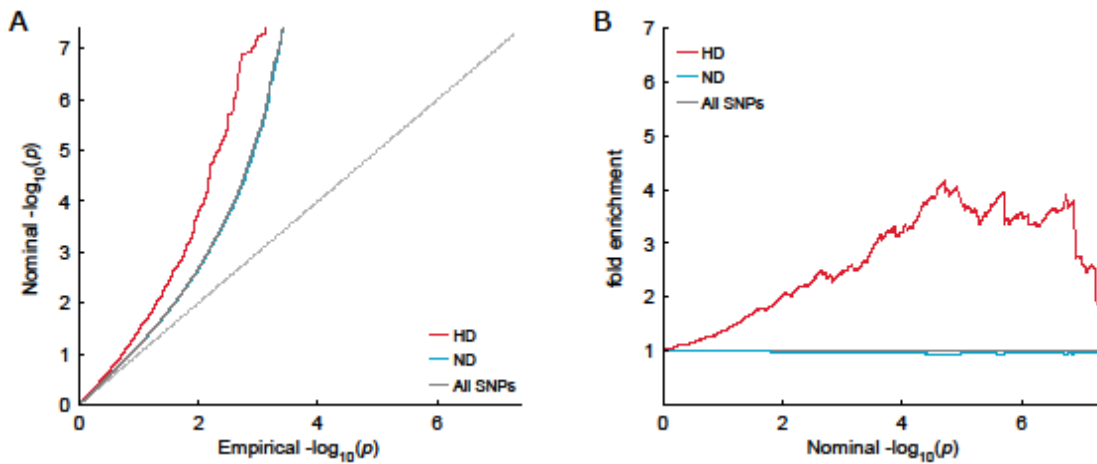

**Fig. S9. Q-Q and fold enrichment plots of schizophrenia autosome and X chromosome genome-wide association study stratified according to Neanderthal selective sweep score.** Reported are (A) quantile-quantile (Q-Q) and (B) fold enrichment plots of autosome and X chromosome GWAS summary statistics  $p$ -values for schizophrenia, stratified based on Neanderthal selective sweep score. The enrichment of the human divergent (HD) category, represented by its deflection from the diagonal (A), is still clear and we do not see comparable differences from the analysis devoid of the X chromosome (Fig. 1). The non-divergent (ND) SNPs also show unchanged deflection from the baseline (All SNPs).



## **Supplemental Methods & Materials**

### **Confounding Factors**

Possible confounding factors that might influence the results are addressed in the analyses: the effect size computed in the regression analysis typical of most SNP association studies depends on the SNP's frequency  $f$  through its genotypic variance  $2f(1-f)$ . A SNP's frequency or its genotypic variance can therefore constitute confounders if other factors, e.g. the covariates, used in the enrichment analysis are correlated with them. It is possible that SNPs that underwent positive selection after divergence from Neanderthal have unusual frequency distributions. All analyses are therefore carried out while controlling for genotypic variance. The chromosomal linkage disequilibrium (LD) structure is another feature that undergoes differential amounts of transformations depending on the type of selection pressure and is therefore controlled for in the analyses as well.

### **Major Histocompatibility Complex (MHC)**

The MHC has been implicated in schizophrenia as well as a number of other phenotypes, particularly immune-mediated diseases. The evolution of MHC itself may have involved segmental duplication and other large scale genetic variations (28). It is therefore reasonable to suspect that SNPs in these regions might be driving some of the enrichment results. By removing the MHC region (chromosome 6 region between genomic positions 25652429 and 33421466 in the hg19 assembly) from the analyses, we aim at identifying their contribution to the enrichment patterns.

## Replication

The z-scores of each of the 52 original sub-studies contributing to the schizophrenia meta-analysis (8) were independently adjusted using intergenic inflation control: the inflation factor,  $\lambda_{GC}$ , was estimated as the median squared z-score across intergenic SNPs divided by the expected median of a chi-square distribution with one degree of freedom. The 52 sub-studies were then subdivided into two groups of 26 in 50 different ways, the first group,  $D_k$ ,  $k = 1 \dots 100$ , serving as discovery group, the second,  $R_k$ ,  $k = 1 \dots 100$ , as replication group. Average discovery and replication z-scores were computed for all SNPs and all 50 subdivisions

$$\bar{Z}_{D_k} = \frac{1}{\sqrt{N_{\text{eff}}^{D_k}}} \sum_{i \in D_k} Z_i \sqrt{N_{\text{eff}}^{(i)}}, \quad \bar{Z}_{R_k} = \frac{1}{\sqrt{N_{\text{eff}}^{R_k}}} \sum_{i \in R_k} Z_i \sqrt{N_{\text{eff}}^{(i)}}, \quad \text{with } D_k, R_k \subset \{1, \dots, 8\}, \text{ and } k = 1, \dots, 50$$

where

$$N_{\text{eff}}^{(i)} = \frac{N_{\text{cases}}^{(i)} N_{\text{controls}}^{(i)}}{N_{\text{cases}}^{(i)} + N_{\text{controls}}^{(i)}}, \quad \text{and } N_{\text{eff}}^{R_k} = \sum_{i \in R_k} N_{\text{eff}}^{(i)}, \quad N_{\text{eff}}^{D_k} = \sum_{i \in D_k} N_{\text{eff}}^{(i)}.$$

The average Z-scores were converted to  $p$ -values using the standard normal cumulative distribution function  $\Phi$ . Two-tailed discovery  $p$ -values were calculated as  $p_D = 1 - \Phi(|Z_D|) + \Phi(-|Z_D|) = 2 * \Phi(-|Z_D|)$ , one-tailed replication  $p$ -values preserving the signs of the discovery Z-scores were calculated as  $p_R = \Phi(\text{sgn}(Z_D) * Z_R)$ .

## Conditional False Discovery Rate (condFDR)

The observed enrichment can be directly interpreted in terms of the Bayesian FDR (29). Specifically, for a given  $p$ -value cutoff, the FDR is defined as

$$\text{FDR}(p) = \pi_0 F_0(p) / F(p),$$

where  $\pi_0$  is the proportion of null SNPs,  $F_0$  is the null cumulative distribution function (cdf), and  $F$  is the cdf of all SNPs, both null and non-null. Under the null hypothesis,  $F_0(p) = p$  is the cdf of the uniform distribution on the unit interval  $[0,1]$ , so

$$\text{FDR}(p) = \pi_0 p / F(p).$$

$F$  is estimated by the empirical cdf  $q = N_p / N$ , where  $N_p$  is the number of SNPs with  $p$ -values less than or equal to  $p$ , and  $N$  is the total number of SNPs. If  $\pi_0$  is close to one, as is likely true for most GWASs, a reasonable conservative estimate of FDR is  $p/q$ . The negative decadic logarithm of this FDR estimate is  $\log_{10}(q) - \log_{10}(p)$  which coincides with the Q-Q plot's deflection from the null line.

The condFDR is conservatively estimated as  $\text{FDR}(p | x) = p / F(p | x)$ , where  $x$  is the value of a given annotation  $X$ , and  $F(p | x)$  is the cdf of  $p$  conditional on the annotation  $X = x$ . If SNPs are enriched for associations according to levels of  $X$ , then  $F(p | x) > F(p)$  for a given  $p$  and hence  $\text{FDR}(p | x) < \text{FDR}(p)$ .

Upon binning and averaging the conditional FDR values obtained from ten sets of LD-blocks representative SNPs, we constructed a two-dimensional look-up table reporting conditional FDR as a function of the SCZ association  $p$ -value and the NSS score. Through smoothing via interpolation of the look-up table, we then assigned each SNP a conditional FDR value for SCZ (denoted by condFDR).

### **Censored Analysis**

Many of the 108 schizophrenia GWAS hits lie within or around genes that are involved in the biochemistry of neural cells. The genome regions that have undergone a selective sweep according to the NSS score have also been shown to contain genes involved with brain functions.

(26). Affiliation to the brain genes that populate the 108 loci may therefore be confounding the results we observe for the enrichment of NSS regions of the genome. We wanted to see to what extent the results are driven by the 108 schizophrenia GWAS hits. To this end, we repeated the analyses after censoring the GWAS summary stats. Specifically, we excluded from the analyses all SNPs falling less than 1Mbase from any of the reported loci and having an LD ( $r^2 > 0.2$ ) with any of the SNPs therein.

## Author Notes

### *Members of the Schizophrenia Working Group of the Psychiatric Genomics Consortium*

Stephan Ripke<sup>1,2</sup>, Benjamin M. Neale<sup>1,2,3,4</sup>, Aiden Corvin<sup>5</sup>, James T. R. Walters<sup>6</sup>, Kai-How Farh<sup>1</sup>, Peter A. Holmans<sup>6,7</sup>, Phil Lee<sup>1,2,4</sup>, Brendan Bulik-Sullivan<sup>1,2</sup>, David A. Collier<sup>8,9</sup>, Hailiang Huang<sup>1,3</sup>, Tune H. Pers<sup>3,10,11</sup>, Ingrid Agartz<sup>12,13,14</sup>, Esben Agerbo<sup>15,16,17</sup>, Margot Albus<sup>18</sup>, Madeline Alexander<sup>19</sup>, Farooq Amin<sup>20,21</sup>, Silviu A. Bacanu<sup>22</sup>, Martin Begemann<sup>23</sup>, Richard A Belliveau Jr<sup>2</sup>, Judit Bene<sup>24,25</sup>, Sarah E. Bergen<sup>2,26</sup>, Elizabeth Bevilacqua<sup>2</sup>, Tim B Bigdeli<sup>22</sup>, Donald W. Black<sup>27</sup>, Richard Bruggeman<sup>28</sup>, Nancy G. Buccola<sup>29</sup>, Randy L. Buckner<sup>30,31,32</sup>, William Byerley<sup>33</sup>, Wiepke Cahn<sup>34</sup>, Guiqing Cai<sup>35,36</sup>, Murray J. Cairns<sup>39,120,170</sup>, Dominique Champion<sup>37</sup>, Rita M. Cantor<sup>38</sup>, Vaughan J. Carr<sup>39,40</sup>, Noa Carrera<sup>6</sup>, Stanley V. Catts<sup>39,41</sup>, Kimberly D. Chambert<sup>2</sup>, Raymond C. K. Chan<sup>42</sup>, Ronald Y. L. Chen<sup>43</sup>, Eric Y. H. Chen<sup>43,44</sup>, Wei Cheng<sup>45</sup>, Eric F. C. Cheung<sup>46</sup>, Siow Ann Chong<sup>47</sup>, C. Robert Cloninger<sup>48</sup>, David Cohen<sup>49</sup>, Nadine Cohen<sup>50</sup>, Paul Cormican<sup>5</sup>, Nick Craddock<sup>6,7</sup>, James J. Crowley<sup>51</sup>, David Curtis<sup>52,53</sup>, Michael Davidson<sup>54</sup>, Kenneth L. Davis<sup>36</sup>, Franziska Degenhardt<sup>55,56</sup>, Jurgen Del Favero<sup>57</sup>, Lynn E. DeLisi<sup>128,129</sup>, Ditte Demontis<sup>17,58,59</sup>, Dimitris Dikeos<sup>60</sup>, Timothy Dinan<sup>61</sup>, Srdjan Djurovic<sup>14,62</sup>, Gary Donohoe<sup>5,63</sup>, Elodie Drapeau<sup>36</sup>, Jubao Duan<sup>64,65</sup>, Frank Dudbridge<sup>66</sup>, Naser Durmishi<sup>67</sup>, Peter Eichhammer<sup>68</sup>, Johan Eriksson<sup>69,70,71</sup>, Valentina Escott-Price<sup>6</sup>, Laurent Essioux<sup>72</sup>, Ayman H. Fanous<sup>73,74,75,76</sup>, Martilias S. Farrell<sup>51</sup>, Josef Frank<sup>77</sup>, Lude Franke<sup>78</sup>, Robert Freedman<sup>79</sup>, Nelson B. Freimer<sup>80</sup>, Marion Friedl<sup>81</sup>, Joseph I. Friedman<sup>36</sup>, Menachem Fromer<sup>1,2,4,82</sup>, Giulio Genovese<sup>2</sup>, Lyudmila Georgieva<sup>6</sup>, Elliot S. Gershon<sup>209</sup>, Ina Giegling<sup>81,83</sup>, Paola Giusti-Rodríguez<sup>51</sup>, Stephanie Godard<sup>84</sup>, Jacqueline I. Goldstein<sup>1,3</sup>, Vera Golimbet<sup>85</sup>, Srihari Gopal<sup>86</sup>, Jacob Gratten<sup>87</sup>, Lieuwe de Haan<sup>88</sup>, Christian Hammer<sup>23</sup>, Marian L. Hamshere<sup>6</sup>, Mark Hansen<sup>89</sup>, Thomas Hansen<sup>17,90</sup>,

Vahram Haroutunian<sup>36,91,92</sup>, Annette M. Hartmann<sup>81</sup>, Frans A. Henskens<sup>39,93,94</sup>, Stefan Herms<sup>55,56,95</sup>, Joel N. Hirschhorn<sup>3,11,96</sup>, Per Hoffmann<sup>55,56,95</sup>, Andrea Hofman<sup>55,56</sup>, Mads V. Hollegaard<sup>97</sup>, David M. Hougaard<sup>97</sup>, Masashi Ikeda<sup>98</sup>, Inge Joa<sup>99</sup>, Antonio Julià<sup>100</sup>, René S. Kahn<sup>34</sup>, Luba Kalaydjieva<sup>101,102</sup>, Sena Karachanak-Yankova<sup>103</sup>, Juha Karjalainen<sup>78</sup>, David Kavanagh<sup>6</sup>, Matthew C. Keller<sup>104</sup>, Brian J. Kelly<sup>120</sup>, James L. Kennedy<sup>105,106,107</sup>, Andrey Khrunin<sup>108</sup>, Yunjung Kim<sup>51</sup>, Janis Klovins<sup>109</sup>, James A. Knowles<sup>110</sup>, Bettina Konte<sup>81</sup>, Vaidutis Kucinskas<sup>111</sup>, Zita Ausrele Kucinskiene<sup>111</sup>, Hana Kuzelova-Ptackova<sup>112</sup>, Anna K. Kähler<sup>26</sup>, Claudine Laurent<sup>19,113</sup>, Jimmy Lee Chee Keong<sup>47,114</sup>, S. Hong Lee<sup>87</sup>, Sophie E. Legge<sup>6</sup>, Bernard Lerer<sup>115</sup>, Miaoxin Li<sup>43,44,116</sup>, Tao Li<sup>117</sup>, Kung-Yee Liang<sup>118</sup>, Jeffrey Lieberman<sup>119</sup>, Svetlana Limborska<sup>108</sup>, Carmel M. Loughland<sup>39,120</sup>, Jan Lubinski<sup>121</sup>, Jouko Lönnqvist<sup>122</sup>, Milan Macek Jr<sup>112</sup>, Patrik K. E. Magnusson<sup>26</sup>, Brion S. Maher<sup>123</sup>, Wolfgang Maier<sup>124</sup>, Jacques Mallet<sup>125</sup>, Sara Marsal<sup>100</sup>, Manuel Mattheisen<sup>17,58,59,126</sup>, Morten Mattingsdal<sup>14,127</sup>, Robert W. McCarley<sup>128,129</sup>, Colm McDonald<sup>130</sup>, Andrew M. McIntosh<sup>131,132</sup>, Sandra Meier<sup>77</sup>, Carin J. Meijer<sup>88</sup>, Bela Melegh<sup>24,25</sup>, Ingrid Melle<sup>14,133</sup>, Raquella I. Mesholam-Gately<sup>128,134</sup>, Andres Metspalu<sup>135</sup>, Patricia T. Michie<sup>39,136</sup>, Lili Milani<sup>135</sup>, Vihra Milanova<sup>137</sup>, Younes Mokrab<sup>8</sup>, Derek W. Morris<sup>5,63</sup>, Ole Mors<sup>17,58,138</sup>, Kieran C. Murphy<sup>139</sup>, Robin M. Murray<sup>140</sup>, Inez Myin-Germeys<sup>141</sup>, Bertram Müller-Myhsok<sup>142,143,144</sup>, Mari Nelis<sup>135</sup>, Igor Nenadic<sup>145</sup>, Deborah A. Nertney<sup>146</sup>, Gerald Nestadt<sup>147</sup>, Kristin K. Nicodemus<sup>148</sup>, Liene Nikitina-Zake<sup>109</sup>, Laura Nisenbaum<sup>149</sup>, Annelie Nordin<sup>150</sup>, Eadbhard O'Callaghan<sup>151</sup>, Colm O'Dushlaine<sup>2</sup>, F. Anthony O'Neill<sup>152</sup>, Sang-Yun Oh<sup>153</sup>, Ann Olincy<sup>79</sup>, Line Olsen<sup>17,90</sup>, Jim Van Os<sup>141,154</sup>, Psychosis Endophenotypes International Consortium<sup>155</sup>, Christos Pantelis<sup>39,156</sup>, George N. Papadimitriou<sup>60</sup>, Sergi Papiol<sup>23</sup>, Elena Parkhomenko<sup>36</sup>, Michele T. Pato<sup>110</sup>, Tiina Paunio<sup>157,158</sup>, Milica Pejovic-Milovancevic<sup>159</sup>, Diana O. Perkins<sup>160</sup>, Olli Pietiläinen<sup>158,161</sup>, Jonathan Pimm<sup>53</sup>, Andrew J. Pocklington<sup>6</sup>, John Powell<sup>140</sup>, Alkes Price<sup>3,162</sup>, Ann E. Pulver<sup>147</sup>, Shaun M. Purcell<sup>82</sup>, Digby Quested<sup>163</sup>, Henrik B. Rasmussen<sup>17,90</sup>, Abraham Reichenberg<sup>36</sup>, Mark A. Reimers<sup>164</sup>, Alexander L. Richards<sup>6</sup>, Joshua L. Roffman<sup>30,32</sup>, Panos Roussos<sup>82,165</sup>, Douglas M. Ruderfer<sup>6,82</sup>, Veikko Salomaa<sup>71</sup>, Alan R. Sanders<sup>64,65</sup>, Ulrich Schall<sup>39,120</sup>, Christian R. Schubert<sup>166</sup>, Thomas G. Schulze<sup>77,167</sup>, Sibylle G. Schwab<sup>168</sup>, Edward M. Scolnick<sup>2</sup>, Rodney J. Scott<sup>39,169,170</sup>, Larry J. Seidman<sup>128,134</sup>, Jianxin Shi<sup>171</sup>, Engilbert Sigurdsson<sup>172</sup>, Teimuraz Silagadze<sup>173</sup>, Jeremy M. Silverman<sup>36,174</sup>, Kang Sim<sup>47</sup>, Petr Slominsky<sup>108</sup>, Jordan W. Smoller<sup>2,4</sup>, Hon-Cheong So<sup>43</sup>, Chris C. A. Spencer<sup>175</sup>, Eli A. Stahl<sup>3,82</sup>, Hreinn Stefansson<sup>176</sup>, Stacy Steinberg<sup>176</sup>, Elisabeth Stogmann<sup>177</sup>, Richard E. Straub<sup>178</sup>, Eric Strengman<sup>179,34</sup>, Jana Strohmaier<sup>77</sup>, T. Scott Stroup<sup>119</sup>, Mythily Subramaniam<sup>47</sup>, Jaana Suvisaari<sup>122</sup>, Dragan M. Svrakic<sup>48</sup>, Jin P. Szatkiewicz<sup>51</sup>, Erik Söderman<sup>12</sup>, Srinivas Thirumalai<sup>180</sup>, Draga Toncheva<sup>103</sup>, Paul A. Tooney<sup>39,120,170</sup>, Sarah Tosato<sup>181</sup>, Juha Veijola<sup>182,183</sup>, John Waddington<sup>184</sup>, Dermot Walsh<sup>185</sup>, Dai Wang<sup>86</sup>, Qiang Wang<sup>117</sup>, Bradley T. Webb<sup>22</sup>, Mark

Weiser<sup>54</sup>, Dieter B. Wildenauer<sup>186</sup>, Nigel M. Williams<sup>6</sup>, Stephanie Williams<sup>51</sup>, Stephanie H. Witt<sup>77</sup>, Aaron R. Wolen<sup>164</sup>, Emily H. M. Wong<sup>43</sup>, Brandon K. Wormley<sup>22</sup>, Jing Qin Wu<sup>39,170</sup>, Hualin Simon Xi<sup>187</sup>, Clement C. Zai<sup>105,106</sup>, Xuebin Zheng<sup>188</sup>, Fritz Zimprich<sup>177</sup>, Naomi R. Wray<sup>87</sup>, Kari Stefansson<sup>176</sup>, Peter M. Visscher<sup>87</sup>, Wellcome Trust Case-Control Consortium 2<sup>189</sup>, Rolf Adolfsson<sup>150</sup>, Ole A. Andreassen<sup>14,133</sup>, Douglas H. R. Blackwood<sup>132</sup>, Elvira Bramon<sup>190</sup>, Joseph D. Buxbaum<sup>35,36,91,191</sup>, Anders D. Børghlum<sup>17,58,59,138</sup>, Sven Cichon<sup>55,56,95,192</sup>, Ariel Darvasi<sup>193</sup>, Enrico Domenici<sup>194</sup>, Hannelore Ehrenreich<sup>23</sup>, Tõnu Esko<sup>3,11,96,135</sup>, Pablo V. Gejman<sup>64,65</sup>, Michael Gill<sup>5</sup>, Hugh Gurling<sup>53</sup>, Christina M. Hultman<sup>26</sup>, Nakao Iwata<sup>98</sup>, Assen V. Jablensky<sup>39,102,186,195</sup>, Erik G. Jönsson<sup>12,14</sup>, Kenneth S. Kendler<sup>196</sup>, George Kirov<sup>6</sup>, Jo Knight<sup>105,106,107</sup>, Todd Lencz<sup>197,198,199</sup>, Douglas F. Levinson<sup>19</sup>, Qingqin S. Li<sup>86</sup>, Jianjun Liu<sup>188,200</sup>, Anil K. Malhotra<sup>197,198,199</sup>, Steven A. McCarroll<sup>2,96</sup>, Andrew McQuillin<sup>53</sup>, Jennifer L. Moran<sup>2</sup>, Preben B. Mortensen<sup>15,16,17</sup>, Bryan J. Mowry<sup>87,201</sup>, Markus M. Nöthen<sup>55,56</sup>, Roel A. Ophoff<sup>38,80,34</sup>, Michael J. Owen<sup>6,7</sup>, Aarno Palotie<sup>2,4,161</sup>, Carlos N. Pato<sup>110</sup>, Tracey L. Petryshen<sup>2,128,202</sup>, Danielle Posthuma<sup>203,204,205</sup>, Marcella Rietschel<sup>77</sup>, Brien P. Riley<sup>196</sup>, Dan Rujescu<sup>81,83</sup>, Pak C. Sham<sup>43,44,116</sup>, Pamela Sklar<sup>82,91,165</sup>, David St Clair<sup>206</sup>, Daniel R. Weinberger<sup>178,207</sup>, Jens R. Wendland<sup>166</sup>, Thomas Werge<sup>17,90,208</sup>, Mark J. Daly<sup>1,2,3</sup>, Patrick F. Sullivan<sup>26,51,160</sup> & Michael C. O'Donovan<sup>6,7</sup>

<sup>1</sup>Analytic and Translational Genetics Unit, Massachusetts General Hospital, Boston, Massachusetts 02114, USA.

<sup>2</sup>Stanley Center for Psychiatric Research, Broad Institute of MIT and Harvard, Cambridge, Massachusetts 02142, USA.

<sup>3</sup>Medical and Population Genetics Program, Broad Institute of MIT and Harvard, Cambridge, Massachusetts 02142, USA.

<sup>4</sup>Psychiatric and Neurodevelopmental Genetics Unit, Massachusetts General Hospital, Boston, Massachusetts 02114, USA.

<sup>5</sup>Neuropsychiatric Genetics Research Group, Department of Psychiatry, Trinity College Dublin, Dublin 8, Ireland.

<sup>6</sup>MRC Centre for Neuropsychiatric Genetics and Genomics, Institute of Psychological Medicine and Clinical Neurosciences, School of Medicine, Cardiff University, Cardiff, CF24 4HQ, UK.

<sup>7</sup>National Centre for Mental Health, Cardiff University, Cardiff, CF24 4HQ, UK.

<sup>8</sup>Eli Lilly and Company Limited, Erl Wood Manor, Sunninghill Road, Windlesham, Surrey, GU20 6PH, UK.

<sup>9</sup>Social, Genetic and Developmental Psychiatry Centre, Institute of Psychiatry, King's College London, London, SE5 8AF, UK.

<sup>10</sup>Center for Biological Sequence Analysis, Department of Systems Biology, Technical University of Denmark, DK-2800, Denmark.

<sup>11</sup>Division of Endocrinology and Center for Basic and Translational Obesity Research, Boston Children's Hospital, Boston, Massachusetts, 02115 USA.

<sup>12</sup>Department of Clinical Neuroscience, Psychiatry Section, Karolinska Institutet, SE-17176 Stockholm, Sweden.

<sup>13</sup>Department of Psychiatry, Diakonhjemmet Hospital, 0319 Oslo, Norway.

<sup>14</sup>NORMENT, KG Jebsen Centre for Psychosis Research, Institute of Clinical Medicine, University of Oslo, 0424 Oslo, Norway.

<sup>15</sup>Centre for Integrative Register-based Research, CIRRAU, Aarhus University, DK-8210 Aarhus, Denmark.

<sup>16</sup>National Centre for Register-based Research, Aarhus University, DK-8210 Aarhus, Denmark.

<sup>17</sup>The Lundbeck Foundation Initiative for Integrative Psychiatric Research, iPSYCH, Denmark.

<sup>18</sup>State Mental Hospital, 85540 Haar, Germany.

<sup>19</sup>Department of Psychiatry and Behavioral Sciences, Stanford University, Stanford, California 94305, USA.

<sup>20</sup>Department of Psychiatry and Behavioral Sciences, Atlanta Veterans Affairs Medical Center, Atlanta, Georgia 30033, USA.

<sup>21</sup>Department of Psychiatry and Behavioral Sciences, Emory University, Atlanta Georgia 30322, USA.

<sup>22</sup>Virginia Institute for Psychiatric and Behavioral Genetics, Department of Psychiatry, Virginia Commonwealth University, Richmond, Virginia 23298, USA.

<sup>23</sup>Clinical Neuroscience, Max Planck Institute of Experimental Medicine, Göttingen 37075, Germany.

<sup>24</sup>Department of Medical Genetics, University of Pécs, Pécs H-7624, Hungary.

<sup>25</sup>Szentagothai Research Center, University of Pécs, Pécs H-7624, Hungary.

<sup>26</sup>Department of Medical Epidemiology and Biostatistics, Karolinska Institutet, Stockholm SE-17177, Sweden.

<sup>27</sup>Department of Psychiatry, University of Iowa Carver College of Medicine, Iowa City, Iowa 52242, USA.

<sup>28</sup>University Medical Center Groningen, Department of Psychiatry, University of Groningen NL-9700 RB, The Netherlands.

<sup>29</sup>School of Nursing, Louisiana State University Health Sciences Center, New Orleans, Louisiana 70112, USA.

<sup>30</sup>Athinoula A. Martinos Center, Massachusetts General Hospital, Boston, Massachusetts 02129, USA.

<sup>31</sup>Center for Brain Science, Harvard University, Cambridge, Massachusetts, 02138 USA.

<sup>32</sup>Department of Psychiatry, Massachusetts General Hospital, Boston, Massachusetts, 02114 USA.

<sup>33</sup>Department of Psychiatry, University of California at San Francisco, San Francisco, California, 94143 USA.

<sup>34</sup>University Medical Center Utrecht, Department of Psychiatry, Rudolf Magnus Institute of Neuroscience, 3584 Utrecht, The Netherlands.

<sup>35</sup>Department of Human Genetics, Icahn School of Medicine at Mount Sinai, New York, New York 10029 USA.

<sup>36</sup>Department of Psychiatry, Icahn School of Medicine at Mount Sinai, New York, New York 10029 USA.

<sup>37</sup>Centre Hospitalier du Rouvray and INSERM U1079 Faculty of Medicine, 76301 Rouen, France.

<sup>38</sup>Department of Human Genetics, David Geffen School of Medicine, University of California, Los Angeles, California 90095, USA.

<sup>39</sup>Schizophrenia Research Institute, Sydney NSW 2010, Australia.

<sup>40</sup>School of Psychiatry, University of New South Wales, Sydney NSW 2031, Australia.

<sup>41</sup>Royal Brisbane and Women's Hospital, University of Queensland, Brisbane, St Lucia QLD 4072, Australia.

<sup>42</sup>Institute of Psychology, Chinese Academy of Science, Beijing 100101, China.

<sup>43</sup>Department of Psychiatry, Li Ka Shing Faculty of Medicine, The University of Hong Kong, Hong Kong, China.

<sup>44</sup>State Key Laboratory for Brain and Cognitive Sciences, Li Ka Shing Faculty of Medicine, The University of Hong Kong, Hong Kong, China.

<sup>45</sup>Department of Computer Science, University of North Carolina, Chapel Hill, North Carolina 27514, USA.

<sup>46</sup>Castle Peak Hospital, Hong Kong, China.

<sup>47</sup>Institute of Mental Health, Singapore 539747, Singapore.

<sup>48</sup>Department of Psychiatry, Washington University, St. Louis, Missouri 63110, USA.

<sup>49</sup>Department of Child and Adolescent Psychiatry, Assistance Publique Hopitaux de Paris, Pierre and Marie Curie Faculty of Medicine and Institute for Intelligent Systems and Robotics, Paris, 75013, France.

<sup>50</sup>Blue Note Biosciences, Princeton, New Jersey 08540, USA

<sup>51</sup>Department of Genetics, University of North Carolina, Chapel Hill, North Carolina 27599-7264, USA.

<sup>52</sup>Department of Psychological Medicine, Queen Mary University of London, London E1 1BB, UK.

<sup>53</sup>Molecular Psychiatry Laboratory, Division of Psychiatry, University College London, London WC1E 6JJ, UK.

<sup>54</sup>Sheba Medical Center, Tel Hashomer 52621, Israel.

<sup>55</sup>Department of Genomics, Life and Brain Center, D-53127 Bonn, Germany.

<sup>56</sup>Institute of Human Genetics, University of Bonn, D-53127 Bonn, Germany.



<sup>57</sup>Applied Molecular Genomics Unit, VIB Department of Molecular Genetics, University of Antwerp, B-2610 Antwerp, Belgium.

<sup>58</sup>Centre for Integrative Sequencing, iSEQ, Aarhus University, DK-8000 Aarhus C, Denmark.

<sup>59</sup>Department of Biomedicine, Aarhus University, DK-8000 Aarhus C, Denmark.

<sup>60</sup>First Department of Psychiatry, University of Athens Medical School, Athens 11528, Greece.

<sup>61</sup>Department of Psychiatry, University College Cork, Co. Cork, Ireland.

<sup>62</sup>Department of Medical Genetics, Oslo University Hospital, 0424 Oslo, Norway.

<sup>63</sup>Cognitive Genetics and Therapy Group, School of Psychology and Discipline of Biochemistry, National University of Ireland Galway, Co. Galway, Ireland.

<sup>64</sup>Department of Psychiatry and Behavioral Neuroscience, University of Chicago, Chicago, Illinois 60637, USA.

<sup>65</sup>Department of Psychiatry and Behavioral Sciences, NorthShore University HealthSystem, Evanston, Illinois 60201, USA.

<sup>66</sup>Department of Non-Communicable Disease Epidemiology, London School of Hygiene and Tropical Medicine, London WC1E 7HT, UK.

<sup>67</sup>Department of Child and Adolescent Psychiatry, University Clinic of Psychiatry, Skopje 1000, Republic of Macedonia.

<sup>68</sup>Department of Psychiatry, University of Regensburg, 93053 Regensburg, Germany.

<sup>69</sup>Department of General Practice, Helsinki University Central Hospital, University of Helsinki P.O. Box 20, Tukholmankatu 8 B, FI-00014, Helsinki, Finland

<sup>70</sup>Folkhälsan Research Center, Helsinki, Finland, Biomedicum Helsinki 1, Haartmaninkatu 8, FI-00290, Helsinki, Finland.

<sup>71</sup>National Institute for Health and Welfare, P.O. BOX 30, FI-00271 Helsinki, Finland.

<sup>72</sup>Translational Technologies and Bioinformatics, Pharma Research and Early Development, F. Hoffman-La Roche, CH-4070 Basel, Switzerland.

<sup>73</sup>Department of Psychiatry, Georgetown University School of Medicine, Washington DC 20057, USA.

<sup>74</sup>Department of Psychiatry, Keck School of Medicine of the University of Southern California, Los Angeles, California 90033, USA.

<sup>75</sup>Department of Psychiatry, Virginia Commonwealth University School of Medicine, Richmond, Virginia 23298, USA.

<sup>76</sup>Mental Health Service Line, Washington VA Medical Center, Washington DC 20422, USA.

<sup>77</sup>Department of Genetic Epidemiology in Psychiatry, Central Institute of Mental Health, Medical Faculty Mannheim, University of Heidelberg, Heidelberg, D-68159 Mannheim, Germany.

<sup>78</sup>Department of Genetics, University of Groningen, University Medical Centre Groningen, 9700 RB Groningen, The Netherlands.

<sup>79</sup>Department of Psychiatry, University of Colorado Denver, Aurora, Colorado 80045, USA.

<sup>80</sup>Center for Neurobehavioral Genetics, Semel Institute for Neuroscience and Human Behavior, University of California, Los Angeles, California 90095, USA.

<sup>81</sup>Department of Psychiatry, University of Halle, 06112 Halle, Germany.

<sup>82</sup>Division of Psychiatric Genomics, Department of Psychiatry, Icahn School of Medicine at Mount Sinai, New York, New York 10029, USA.

<sup>83</sup>Department of Psychiatry, University of Munich, 80336, Munich, Germany.

<sup>84</sup>Departments of Psychiatry and Human and Molecular Genetics, INSERM, Institut de Myologie, Hôpital de la Pitié-Salpêtrière, Paris, 75013, France.

<sup>85</sup>Mental Health Research Centre, Russian Academy of Medical Sciences, 115522 Moscow, Russia.

<sup>86</sup>Neuroscience Therapeutic Area, Janssen Research and Development, Raritan, New Jersey 08869, USA.

<sup>87</sup>Queensland Brain Institute, The University of Queensland, Brisbane, Queensland, QLD 4072, Australia.

<sup>88</sup>Academic Medical Centre University of Amsterdam, Department of Psychiatry, 1105 AZ Amsterdam, The Netherlands.

<sup>89</sup>Illumina, La Jolla, California, California 92122, USA.

<sup>90</sup>Institute of Biological Psychiatry, Mental Health Centre Sct. Hans, Mental Health Services Copenhagen, DK-4000, Denmark.

<sup>91</sup>Friedman Brain Institute, Icahn School of Medicine at Mount Sinai, New York, New York 10029, USA.

<sup>92</sup>J. J. Peters VA Medical Center, Bronx, New York, New York 10468, USA.

<sup>93</sup>Priority Research Centre for Health Behaviour, University of Newcastle, Newcastle NSW 2308, Australia.

<sup>94</sup>School of Electrical Engineering and Computer Science, University of Newcastle, Newcastle NSW 2308, Australia.

<sup>95</sup>Division of Medical Genetics, Department of Biomedicine, University of Basel, Basel, CH-4058, Switzerland.

<sup>96</sup>Department of Genetics, Harvard Medical School, Boston, Massachusetts 02115, USA.

<sup>97</sup>Section of Neonatal Screening and Hormones, Department of Clinical Biochemistry, Immunology and Genetics, Statens Serum Institut, Copenhagen, DK-2300, Denmark.

<sup>98</sup>Department of Psychiatry, Fujita Health University School of Medicine, Toyoake, Aichi, 470-1192, Japan.

<sup>99</sup>Regional Centre for Clinical Research in Psychosis, Department of Psychiatry, Stavanger University Hospital, 4011 Stavanger, Norway.

<sup>100</sup>Rheumatology Research Group, Vall d'Hebron Research Institute, Barcelona, 08035, Spain.

<sup>101</sup>Centre for Medical Research, The University of Western Australia, Perth, WA 6009, Australia.

<sup>102</sup>The Perkins Institute for Medical Research, The University of Western Australia, Perth, WA 6009, Australia.

<sup>103</sup>Department of Medical Genetics, Medical University, Sofia 1431, Bulgaria.

<sup>104</sup>Department of Psychology, University of Colorado Boulder, Boulder, Colorado 80309, USA.

<sup>105</sup>Campbell Family Mental Health Research Institute, Centre for Addiction and Mental Health, Toronto, Ontario, M5T 1R8, Canada.

<sup>106</sup>Department of Psychiatry, University of Toronto, Toronto, Ontario, M5T 1R8, Canada.

<sup>107</sup>Institute of Medical Science, University of Toronto, Toronto, Ontario, M5S 1A8, Canada.

<sup>108</sup>Institute of Molecular Genetics, Russian Academy of Sciences, Moscow 123182, Russia.

<sup>109</sup>Latvian Biomedical Research and Study Centre, Riga, LV-1067, Latvia.

<sup>110</sup>Department of Psychiatry and Zilkha Neurogenetics Institute, Keck School of Medicine at University of Southern California, Los Angeles, California 90089, USA.

<sup>111</sup>Faculty of Medicine, Vilnius University, LT-01513 Vilnius, Lithuania.

<sup>112</sup> Department of Biology and Medical Genetics, 2nd Faculty of Medicine and University Hospital Motol, 150 06 Prague, Czech Republic.

<sup>113</sup> Department of Child and Adolescent Psychiatry, Pierre and Marie Curie Faculty of Medicine, Paris 75013, France.

<sup>114</sup>Duke-NUS Graduate Medical School, Singapore 169857, Singapore.

<sup>115</sup>Department of Psychiatry, Hadassah-Hebrew University Medical Center, Jerusalem 91120, Israel.

<sup>116</sup>Centre for Genomic Sciences, The University of Hong Kong, Hong Kong, China.

<sup>117</sup>Mental Health Centre and Psychiatric Laboratory, West China Hospital, Sichuan University, Chengdu, 610041, Sichuan, China.

<sup>118</sup>Department of Biostatistics, Johns Hopkins University Bloomberg School of Public Health, Baltimore, Maryland 21205, USA.

<sup>119</sup>Department of Psychiatry, Columbia University, New York, New York 10032, USA.

<sup>120</sup>Priority Centre for Translational Neuroscience and Mental Health, University of Newcastle, Newcastle NSW 2300, Australia.

<sup>121</sup>Department of Genetics and Pathology, International Hereditary Cancer Center, Pomeranian Medical University in Szczecin, 70-453 Szczecin, Poland.

<sup>122</sup>Department of Mental Health and Substance Abuse Services; National Institute for Health and Welfare, P.O. BOX 30, FI-00271 Helsinki, Finland

<sup>123</sup>Department of Mental Health, Bloomberg School of Public Health, Johns Hopkins University, Baltimore, Maryland 21205, USA.

<sup>124</sup>Department of Psychiatry, University of Bonn, D-53127 Bonn, Germany.

<sup>125</sup>Centre National de la Recherche Scientifique, Laboratoire de Génétique Moléculaire de la Neurotransmission et des Processus Neurodégénératifs, Hôpital de la Pitié Salpêtrière, 75013, Paris, France.

<sup>126</sup>Department of Genomics Mathematics, University of Bonn, D-53127 Bonn, Germany.

<sup>127</sup>Research Unit, Sørlandet Hospital, 4604 Kristiansand, Norway.

<sup>128</sup>Department of Psychiatry, Harvard Medical School, Boston, Massachusetts 02115, USA.

<sup>129</sup>VA Boston Health Care System, Brockton, Massachusetts 02301, USA.

<sup>130</sup>Department of Psychiatry, National University of Ireland Galway, Co. Galway, Ireland.

<sup>131</sup>Centre for Cognitive Ageing and Cognitive Epidemiology, University of Edinburgh, Edinburgh EH16 4SB, UK.

<sup>132</sup>Division of Psychiatry, University of Edinburgh, Edinburgh EH16 4SB, UK.

<sup>133</sup>Division of Mental Health and Addiction, Oslo University Hospital, 0424 Oslo, Norway.

<sup>134</sup>Massachusetts Mental Health Center Public Psychiatry Division of the Beth Israel Deaconess Medical Center, Boston, Massachusetts 02114, USA.

<sup>135</sup>Estonian Genome Center, University of Tartu, Tartu 50090, Estonia.

<sup>136</sup>School of Psychology, University of Newcastle, Newcastle NSW 2308, Australia.

<sup>137</sup>First Psychiatric Clinic, Medical University, Sofia 1431, Bulgaria.

<sup>138</sup>Department P, Aarhus University Hospital, DK-8240 Risskov, Denmark.

<sup>139</sup>Department of Psychiatry, Royal College of Surgeons in Ireland, Dublin 2, Ireland.

<sup>140</sup>King's College London, London SE5 8AF, UK.

<sup>141</sup>Maastricht University Medical Centre, South Limburg Mental Health Research and Teaching Network, EURON, 6229 HX Maastricht, The Netherlands.

<sup>142</sup>Institute of Translational Medicine, University of Liverpool, Liverpool L69 3BX, UK.

<sup>143</sup>Max Planck Institute of Psychiatry, 80336 Munich, Germany.

<sup>144</sup>Munich Cluster for Systems Neurology (SyNergy), 80336 Munich, Germany.

<sup>145</sup>Department of Psychiatry and Psychotherapy, Jena University Hospital, 07743 Jena, Germany.

<sup>146</sup>Department of Psychiatry, Queensland Brain Institute and Queensland Centre for Mental Health Research, University of Queensland, Brisbane, Queensland, St Lucia QLD 4072, Australia.

<sup>147</sup>Department of Psychiatry and Behavioral Sciences, Johns Hopkins University School of Medicine, Baltimore, Maryland 21205, USA.

<sup>148</sup>Department of Psychiatry, Trinity College Dublin, Dublin 2, Ireland.

<sup>149</sup>Eli Lilly and Company, Lilly Corporate Center, Indianapolis, 46285 Indiana, USA.

<sup>150</sup>Department of Clinical Sciences, Psychiatry, Umeå University, SE-901 87 Umeå, Sweden.

<sup>151</sup>DETECT Early Intervention Service for Psychosis, Blackrock, Co. Dublin, Ireland.

<sup>152</sup>Centre for Public Health, Institute of Clinical Sciences, Queen's University Belfast, Belfast BT12 6AB, UK.

<sup>153</sup>Lawrence Berkeley National Laboratory, University of California at Berkeley, Berkeley, California 94720, USA.

<sup>154</sup>Institute of Psychiatry, King's College London, London SE5 8AF, UK.

<sup>155</sup>A list of authors and affiliations appear in the Supplementary Information.

<sup>156</sup>Melbourne Neuropsychiatry Centre, University of Melbourne & Melbourne Health, Melbourne, Vic 3053, Australia.

<sup>157</sup>Department of Psychiatry, University of Helsinki, P.O. Box 590, FI-00029 HUS, Helsinki, Finland.

<sup>158</sup>Public Health Genomics Unit, National Institute for Health and Welfare, P.O. BOX 30, FI-00271 Helsinki, Finland

<sup>159</sup>Medical Faculty, University of Belgrade, 11000 Belgrade, Serbia.

<sup>160</sup>Department of Psychiatry, University of North Carolina, Chapel Hill, North Carolina 27599-7160, USA.

<sup>161</sup>Institute for Molecular Medicine Finland, FIMM, University of Helsinki, P.O. Box 20 FI-00014, Helsinki, Finland

<sup>162</sup>Department of Epidemiology, Harvard School of Public Health, Boston, Massachusetts 02115, USA.

<sup>163</sup>Department of Psychiatry, University of Oxford, Oxford, OX3 7JX, UK.

<sup>164</sup>Virginia Institute for Psychiatric and Behavioral Genetics, Virginia Commonwealth University, Richmond, Virginia 23298, USA.

<sup>165</sup>Institute for Multiscale Biology, Icahn School of Medicine at Mount Sinai, New York, New York 10029, USA.

<sup>166</sup>PharmaTherapeutics Clinical Research, Pfizer Worldwide Research and Development, Cambridge, Massachusetts 02139, USA.

- <sup>167</sup>Department of Psychiatry and Psychotherapy, University of Göttingen, 37073 Göttingen, Germany.
- <sup>168</sup>Psychiatry and Psychotherapy Clinic, University of Erlangen, 91054 Erlangen, Germany.
- <sup>169</sup>Hunter New England Health Service, Newcastle NSW 2308, Australia.
- <sup>170</sup>School of Biomedical Sciences and Pharmacy, University of Newcastle, Callaghan NSW 2308, Australia.
- <sup>171</sup>Division of Cancer Epidemiology and Genetics, National Cancer Institute, Bethesda, Maryland 20892, USA.
- <sup>172</sup>University of Iceland, Landspítali, National University Hospital, 101 Reykjavik, Iceland.
- <sup>173</sup>Department of Psychiatry and Drug Addiction, Tbilisi State Medical University (TSMU), **N33, 0177** Tbilisi, Georgia.
- <sup>174</sup>Research and Development, Bronx Veterans Affairs Medical Center, New York, New York 10468, USA.
- <sup>175</sup>Wellcome Trust Centre for Human Genetics, Oxford, OX3 7BN, UK.
- <sup>176</sup>deCODE Genetics, 101 Reykjavik, Iceland.
- <sup>177</sup>Department of Clinical Neurology, Medical University of Vienna, 1090 Wien, Austria.
- <sup>178</sup>Lieber Institute for Brain Development, Baltimore, Maryland 21205, USA.
- <sup>179</sup>Department of Medical Genetics, University Medical Centre Utrecht, Universiteitsweg 100, 3584 CG, Utrecht, The Netherlands.
- <sup>180</sup>Berkshire Healthcare NHS Foundation Trust, Bracknell RG12 1BQ, UK.
- <sup>181</sup>Section of Psychiatry, University of Verona, 37134 Verona, Italy.
- <sup>182</sup>Department of Psychiatry, University of Oulu, P.O. BOX 5000, 90014, Finland
- <sup>183</sup>University Hospital of Oulu, P.O.BOX 20, 90029 OYS, Finland.
- <sup>184</sup>Molecular and Cellular Therapeutics, Royal College of Surgeons in Ireland, Dublin 2, Ireland.
- <sup>185</sup>Health Research Board, Dublin 2, Ireland.
- <sup>186</sup>School of Psychiatry and Clinical Neurosciences, The University of Western Australia, Perth WA6009, Australia.
- <sup>187</sup>Computational Sciences CoE, Pfizer Worldwide Research and Development, Cambridge, Massachusetts 02139, USA.
- <sup>188</sup>Human Genetics, Genome Institute of Singapore, A\*STAR, Singapore 138672, Singapore.
- <sup>189</sup>A list of authors and affiliations appear in the Supplementary Information.
- <sup>190</sup>University College London, London WC1E 6BT, UK.

<sup>191</sup>Department of Neuroscience, Icahn School of Medicine at Mount Sinai, New York, New York 10029, USA.

<sup>192</sup>Institute of Neuroscience and Medicine (INM-1), Research Center Juelich, 52428 Juelich, Germany.

<sup>193</sup>Department of Genetics, The Hebrew University of Jerusalem, 91905 Jerusalem, Israel.

<sup>194</sup>Neuroscience Discovery and Translational Area, Pharma Research and Early Development, F. Hoffman-La Roche, CH-4070 Basel, Switzerland.

<sup>195</sup>Centre for Clinical Research in Neuropsychiatry, School of Psychiatry and Clinical Neurosciences, The University of Western Australia, Medical Research Foundation Building, Perth WA 6000, Australia.

<sup>196</sup>Virginia Institute for Psychiatric and Behavioral Genetics, Departments of Psychiatry and Human and Molecular Genetics, Virginia Commonwealth University, Richmond, Virginia 23298, USA.

<sup>197</sup>The Feinstein Institute for Medical Research, Manhasset, New York, 11030 USA.

<sup>198</sup>The Hofstra NS-LIJ School of Medicine, Hempstead, New York, 11549 USA.

<sup>199</sup>The Zucker Hillside Hospital, Glen Oaks, New York, 11004 USA.

<sup>200</sup>Saw Swee Hock School of Public Health, National University of Singapore, Singapore 117597, Singapore.

<sup>201</sup>Queensland Centre for Mental Health Research, University of Queensland, Brisbane 4076, Queensland, Australia.

<sup>202</sup>Center for Human Genetic Research and Department of Psychiatry, Massachusetts General Hospital, Boston, Massachusetts 02114, USA.

<sup>203</sup>Department of Child and Adolescent Psychiatry, Erasmus University Medical Centre, Rotterdam 3000, The Netherlands.

<sup>204</sup>Department of Complex Trait Genetics, Neuroscience Campus Amsterdam, VU University Medical Center Amsterdam, Amsterdam 1081, The Netherlands.

<sup>205</sup>Department of Functional Genomics, Center for Neurogenomics and Cognitive Research, Neuroscience Campus Amsterdam, VU University, Amsterdam 1081, The Netherlands.

<sup>206</sup>University of Aberdeen, Institute of Medical Sciences, Aberdeen, AB25 2ZD, UK.

<sup>207</sup>Departments of Psychiatry, Neurology, Neuroscience and Institute of Genetic Medicine, Johns Hopkins School of Medicine, Baltimore, Maryland 21205, USA.

<sup>208</sup>Department of Clinical Medicine, University of Copenhagen, Copenhagen 2200, Denmark.

<sup>209</sup>Departments of Psychiatry and Human Genetics, University of Chicago, Chicago, Illinois 60637, USA.

### ***The International Headache Genetics Consortium***

Consortium members listed by their main affiliated cohort:

AGES: Leonore Launer<sup>1</sup>

ALSPAC: George Davey Smith<sup>2</sup>, George McMahon<sup>2</sup>

Australia ATM: Dale Nyholt<sup>3</sup>

Barcelona headache group: Alfons Macaya<sup>4</sup>, Patricia Pozo-Rosich<sup>5</sup>, Bru Cormand<sup>6</sup>, Jessica Fernandez<sup>5</sup>, Marta Vila-Pueyo<sup>4</sup>, Celia Sintas<sup>6</sup>

Danish Headache Center, Glostrup Hospital: Jes Olesen<sup>2</sup>, Anne Francke Christensen<sup>2</sup>, Ann-Louise Esserlind<sup>2</sup>

ERF: Najaf Amin<sup>7</sup>

Estonian Biobank: Tonu Esko<sup>8</sup>

Finnish MA: Aarno Palotie<sup>9</sup>, Mikko Kallela<sup>10</sup>, Maija Wessman<sup>11</sup>, Ville Artto<sup>10</sup>, Verner Anttila<sup>12</sup>, Eija Hämäläinen<sup>13</sup>, Priit Palta<sup>13</sup>, Padhraig Gormley<sup>9</sup>, Ester Cuenca<sup>9</sup>

FinnTwin: Jaakko Kaprio<sup>13</sup>

German MO/MA: Martin Dichgans<sup>14</sup>, Hartmut Göbel<sup>15</sup>, Christian Kubisch<sup>16</sup>, Tobias Freilinger<sup>17</sup>, Rainer Malik<sup>14</sup>, Bertram Muller-Myhsok<sup>18</sup>

HUNT: John-Anker Zwart<sup>19</sup>, Bendik Winsvold<sup>19</sup>, Line Jacobsen<sup>19</sup>, Linda Pedersen<sup>19</sup>

Kaiser Permanente: Alice Pressman<sup>20</sup>

LUMINA MO/MA: Arn van den Maagdenberg<sup>21</sup>, Gisela Terwindt<sup>22</sup>, Boukje de Vries<sup>21</sup>, Rune R. Frants<sup>21</sup>, Michel Ferrari<sup>22</sup>

NTR/NESDA: Dorret I. Boomsma<sup>23</sup>, Lannie Ligthart<sup>23</sup>, Brenda Penninx<sup>24</sup>

NFBC1966: Marjo-Riitta Jarvelin<sup>25</sup>, Markku Koiranen<sup>26</sup>

Rotterdam III: Cornelia van Duijn<sup>7</sup>, M Arfan Ikram<sup>7</sup>

Swedish Twin Registry: Andrea Carmine Belin<sup>27</sup>, Nancy Pedersen<sup>28</sup>

TWINS UK: Lynn Cherkas<sup>29</sup>, Lydia Quaye<sup>29</sup>

WGHS: Daniel Chasman<sup>30</sup>, Tobias Kurth<sup>31</sup>, Markus Schuerks<sup>32</sup>

Young Finns: Terho Lehtimäki<sup>33</sup>, Olli Raitakari<sup>34</sup>

23&Me, Mountainview, California: Nick Eriksson<sup>35</sup>



1. Laboratory of Epidemiology, Demography and Biometry, National Institute on Aging, Bethesda, Maryland, USA.
2. Medical Research Council (MRC) Integrative Epidemiology Unit at the University of Bristol, Bristol, UK.
3. Queensland Institute of Medical Research, Brisbane, Queensland, Australia.
4. Pediatric Neurology Research Group, Institut de Recerca (VHIR), Universitat Autònoma de Barcelona, Barcelona, Spain.
5. Headache and Neurological Pain Research Group, Institut de Recerca (VHIR), Universitat Autònoma de Barcelona, Barcelona.
6. Departament de Genètica, Facultat de Biologia, Universitat de Barcelona, Barcelona, Spain.
7. Department of Epidemiology, Erasmus University Medical Centre, Rotterdam, The Netherlands.
8. Estonian Genome Center, University of Tartu, Tartu, Estonia.
9. Program in Medical and Population Genetics, Broad Institute of Harvard and MIT, Cambridge, MA, USA.
10. Department of Neurology, Helsinki University Central Hospital, Helsinki, Finland.
11. Institute of Genetics, Folkhälsan Research Center, Helsinki, Finland.
12. Analytic and Translational Genetics Unit, Massachusetts General Hospital, Boston, MA, USA.
13. Institute for Molecular Medicine Finland (FIMM), University of Helsinki, Helsinki, Finland.
14. Institute for Stroke and Dementia Research, Klinikum der Universität München, Ludwig-Maximilians-Universität, Munich, Germany.
15. Kiel Pain and Headache Center, Kiel, Germany.
16. Institute of Human Genetics, University of Ulm, Ulm, Germany.
17. Department of Neurology and Epileptology and Hertie-Institute for Clinical Brain Research, University of Tübingen.
18. Max Planck Institute of Psychiatry, Munich, Germany.
19. FORMI, Oslo University Hospital, Oslo, Norway.
20. Division of Research, Kaiser Permanente, Oakland, CA, USA.
21. Department of Human Genetics, Leiden University Medical Centre, Leiden, The Netherlands.
22. Department of Neurology, Leiden University Medical Centre, Leiden, The Netherlands.
23. Department of Biological Psychology, VU University, Amsterdam, The Netherlands.
24. Department of Psychiatry, VU University Medical Center, Amsterdam, The Netherlands.

- <sup>25</sup>. Biocenter Oulu, University of Oulu, Oulu, Finland.
- <sup>26</sup>. Institute of Health Sciences, University of Oulu, Oulu, Finland.
- <sup>27</sup>. Department of Neuroscience, Karolinska Institutet, Stockholm, Sweden.
- <sup>28</sup>. Department of Medical Epidemiology and Biostatistics, Karolinska Institutet, Stockholm, Sweden.
- <sup>29</sup>. Department of Twin Research and Genetic Epidemiology, King's College London, London, UK.
- <sup>30</sup>. Division of Preventive Medicine, Brigham and Women's Hospital, Harvard Medical School, Boston, MA, USA.
- <sup>31</sup>. Institut National de la Santé et de la Recherche Médicale (INSERM) Research Center for Epidemiology and Biostatistics (U897) Team–Neuroepidemiology, Bordeaux, France.
- <sup>32</sup>. Department of Neurology, University Hospital Essen, Essen, Germany.
- <sup>33</sup>. Department of Clinical Chemistry, Fimlab Laboratories, Tampere, Finland.
- <sup>34</sup>. Department of Clinical Physiology and Nuclear Medicine, Turku University Hospital, Turku, Finland.
- <sup>35</sup>. 23andMe, Mountain View, California, USA.

## Supplemental References

1. Lambert JC, Ibrahim-Verbaas CA, Harold D, Naj AC, Sims R, Bellenguez C, *et al.* (2013): Meta-Analysis of 74,046 Individuals Identifies 11 New Susceptibility Loci for Alzheimer's Disease. *Nat Genet.* 45:1452-1458.
2. Neale BM, Medland SE, Ripke S, Asherson P, Franke B, Lesch KP, *et al.* (2010): Meta-Analysis of Genome-Wide Association Studies of Attention-Deficit/Hyperactivity Disorder. *J Am Acad Child Adolesc Psychiatry.* 49:884-897.
3. Psychiatric GCBWDWG (2011): Large-Scale Genome-Wide Association Analysis of Bipolar Disorder Identifies a New Susceptibility Locus near Odz4. *Nat Genet.* 43:977-983.
4. Ripke S, Wray NR, Lewis CM, Hamilton SP, Weissman MM, Breen G, *et al.* (2013): A Mega-Analysis of Genome-Wide Association Studies for Major Depressive Disorder. *Mol Psychiatry.* 18:497-511.
5. Anttila V, Winsvold BS, Gormley P, Kurth T, Bettella F, McMahon G, *et al.* (2013): Genome-Wide Meta-Analysis Identifies New Susceptibility Loci for Migraine. *Nat Genet.* 45:912-917.
6. Sawcer S, Hellenthal G, Pirinen M, Spencer CC, Patsopoulos NA, Moutsianas L, *et al.* (2011): Genetic Risk and a Primary Role for Cell-Mediated Immune Mechanisms in Multiple Sclerosis. *Nature.* 476:214-219.
7. Ripke S, O'Dushlaine C, Chambert K, Moran JL, Kahler AK, Akterin S, *et al.* (2013): Genome-Wide Association Analysis Identifies 13 New Risk Loci for Schizophrenia. *Nat Genet.* 45:1150-1159.
8. Schizophrenia Working Group of the Psychiatric Genomics C (2014): Biological Insights from 108 Schizophrenia-Associated Genetic Loci. *Nature.* 511:421-427.
9. Speliotes EK, Willer CJ, Berndt SI, Monda KL, Thorleifsson G, Jackson AU, *et al.* (2010): Association Analyses of 249,796 Individuals Reveal 18 New Loci Associated with Body Mass Index. *Nat Genet.* 42:937-948.
10. Lango Allen H, Estrada K, Lettre G, Berndt SI, Weedon MN, Rivadeneira F, *et al.* (2010): Hundreds of Variants Clustered in Genomic Loci and Biological Pathways Affect Human Height. *Nature.* 467:832-838.
11. Heid IM, Jackson AU, Randall JC, Winkler TW, Qi L, Steinthorsdottir V, *et al.* (2010): Meta-Analysis Identifies 13 New Loci Associated with Waist-Hip Ratio and Reveals Sexual Dimorphism in the Genetic Basis of Fat Distribution. *Nat Genet.* 42:949-960.

12. Ehret GB, Munroe PB, Rice KM, Bochud M, Johnson AD, Chasman DI, *et al.* (2011): Genetic Variants in Novel Pathways Influence Blood Pressure and Cardiovascular Disease Risk. *Nature*. 478:103-109.
13. Teslovich TM, Musunuru K, Smith AV, Edmondson AC, Stylianou IM, Koseki M, *et al.* (2010): Biological, Clinical and Population Relevance of 95 Loci for Blood Lipids. *Nature*. 466:707-713.
14. Franke A, McGovern DP, Barrett JC, Wang K, Radford-Smith GL, Ahmad T, *et al.* (2010): Genome-Wide Meta-Analysis Increases to 71 the Number of Confirmed Crohn's Disease Susceptibility Loci. *Nat Genet*. 42:1118-1125.
15. Dubois PC, Trynka G, Franke L, Hunt KA, Romanos J, Curtotti A, *et al.* (2010): Multiple Common Variants for Celiac Disease Influencing Immune Gene Expression. *Nat Genet*. 42:295-302.
16. Stahl EA, Raychaudhuri S, Remmers EF, Xie G, Eyre S, Thomson BP, *et al.* (2010): Genome-Wide Association Study Meta-Analysis Identifies Seven New Rheumatoid Arthritis Risk Loci. *Nat Genet*. 42:508-514.
17. Anderson CA, Boucher G, Lees CW, Franke A, D'Amato M, Taylor KD, *et al.* (2011): Meta-Analysis Identifies 29 Additional Ulcerative Colitis Risk Loci, Increasing the Number of Confirmed Associations to 47. *Nat Genet*. 43:246-252.
18. Grabner CP, Price SD, Lysakowski A, Cahill AL, Fox AP (2006): Regulation of Large Dense-Core Vesicle Volume and Neurotransmitter Content Mediated by Adaptor Protein 3. *Proc Natl Acad Sci U S A*. 103:10035-10040.
19. Weinberg MS, Barichievy S, Schaffer L, Han J, Morris KV (2007): An Rna Targeted to the Hiv-1 Ltr Promoter Modulates Indiscriminate Off-Target Gene Activation. *Nucleic Acids Res*. 35:7303-7312.
20. Guarguaglini G, Duncan PI, Stierhof YD, Holmström T, Duensing S, Nigg EA (2005): The Forkhead-Associated Domain Protein Cep170 Interacts with Polo-Like Kinase 1 and Serves as a Marker for Mature Centrioles. *Mol Biol Cell*. 16:1095-1107.
21. Girirajan S, Dennis Megan Y, Baker C, Malig M, Coe Bradley P, Campbell Catarina D, *et al.* (2013): Refinement and Discovery of New Hotspots of Copy-Number Variation Associated with Autism Spectrum Disorder. *Am J Hum Genet*. 92:221-237.
22. Nowakowska BA, Obersztyn E, Szymanska K, Bekiesinska-Figatowska M, Xia Z, Ricks CB, *et al.* (2010): Severe Mental Retardation, Seizures, and Hypotonia Due to Deletions of Mef2c. *Am J Med Genet B Neuropsychiatr Genet*. 153b:1042-1051.

23. Duong L, Klitten LL, Moller RS, Ingason A, Jakobsen KD, Skjodt C, *et al.* (2012): Mutations in *Nrxn1* in a Family Multiply Affected with Brain Disorders: *Nrxn1* Mutations and Brain Disorders. *Am J Med Genet B Neuropsychiatr Genet.* 159b:354-358.
24. Amaral PP, Neyt C, Wilkins SJ, Askarian-Amiri ME, Sunkin SM, Perkins AC, *et al.* (2009): Complex Architecture and Regulated Expression of the *Sox2ot* Locus During Vertebrate Development. *RNA.* 15:2013-2027.
25. Sartoris S, Brendolan A, Degola A, Testi MG, Chignola R, Scarpa A, *et al.* (2000): Analysis of Ciita Encoding Air-1 Gene Promoters in Insulin-Dependent Diabetes Mellitus and Rheumatoid Arthritis Patients from the Northeast of Italy: Absence of Sequence Variability. *Hum Immunol.* 61:599-604.
26. Green RE, Krause J, Briggs AW, Maricic T, Stenzel U, Kircher M, *et al.* (2010): A Draft Sequence of the Neandertal Genome. *Science.* 328:710-722.
27. Prufer K, Racimo F, Patterson N, Jay F, Sankararaman S, Sawyer S, *et al.* (2014): The Complete Genome Sequence of a Neanderthal from the Altai Mountains. *Nature.* 505:43-49.
28. Kulski JK, Gaudieri S, Bellgard M, Balmer L, Giles K, Inoko H, *et al.* (1997): The Evolution of Mhc Diversity by Segmental Duplication and Transposition of Retroelements. *J Mol Evol.* 45:599-609.
29. Storey JD (2003): The Positive False Discovery Rate: A Bayesian Interpretation and the Q-Value. *Ann Stat.* 31:2013-2035.
